# Supplementary material
Source: ML conference proceedings conference paper supplement (https://aclanthology.org/2020.acl-main.597)

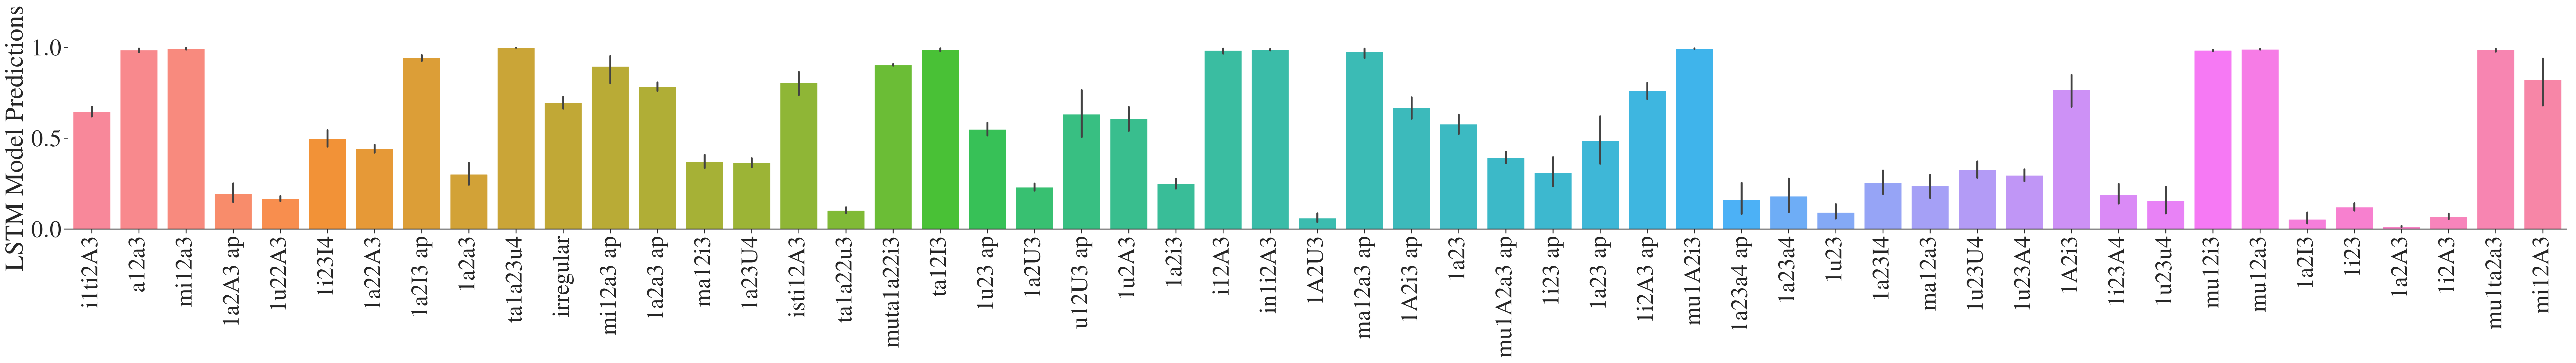

Supplement: Software [file Araform.pdf › figs/Araform.pdf]

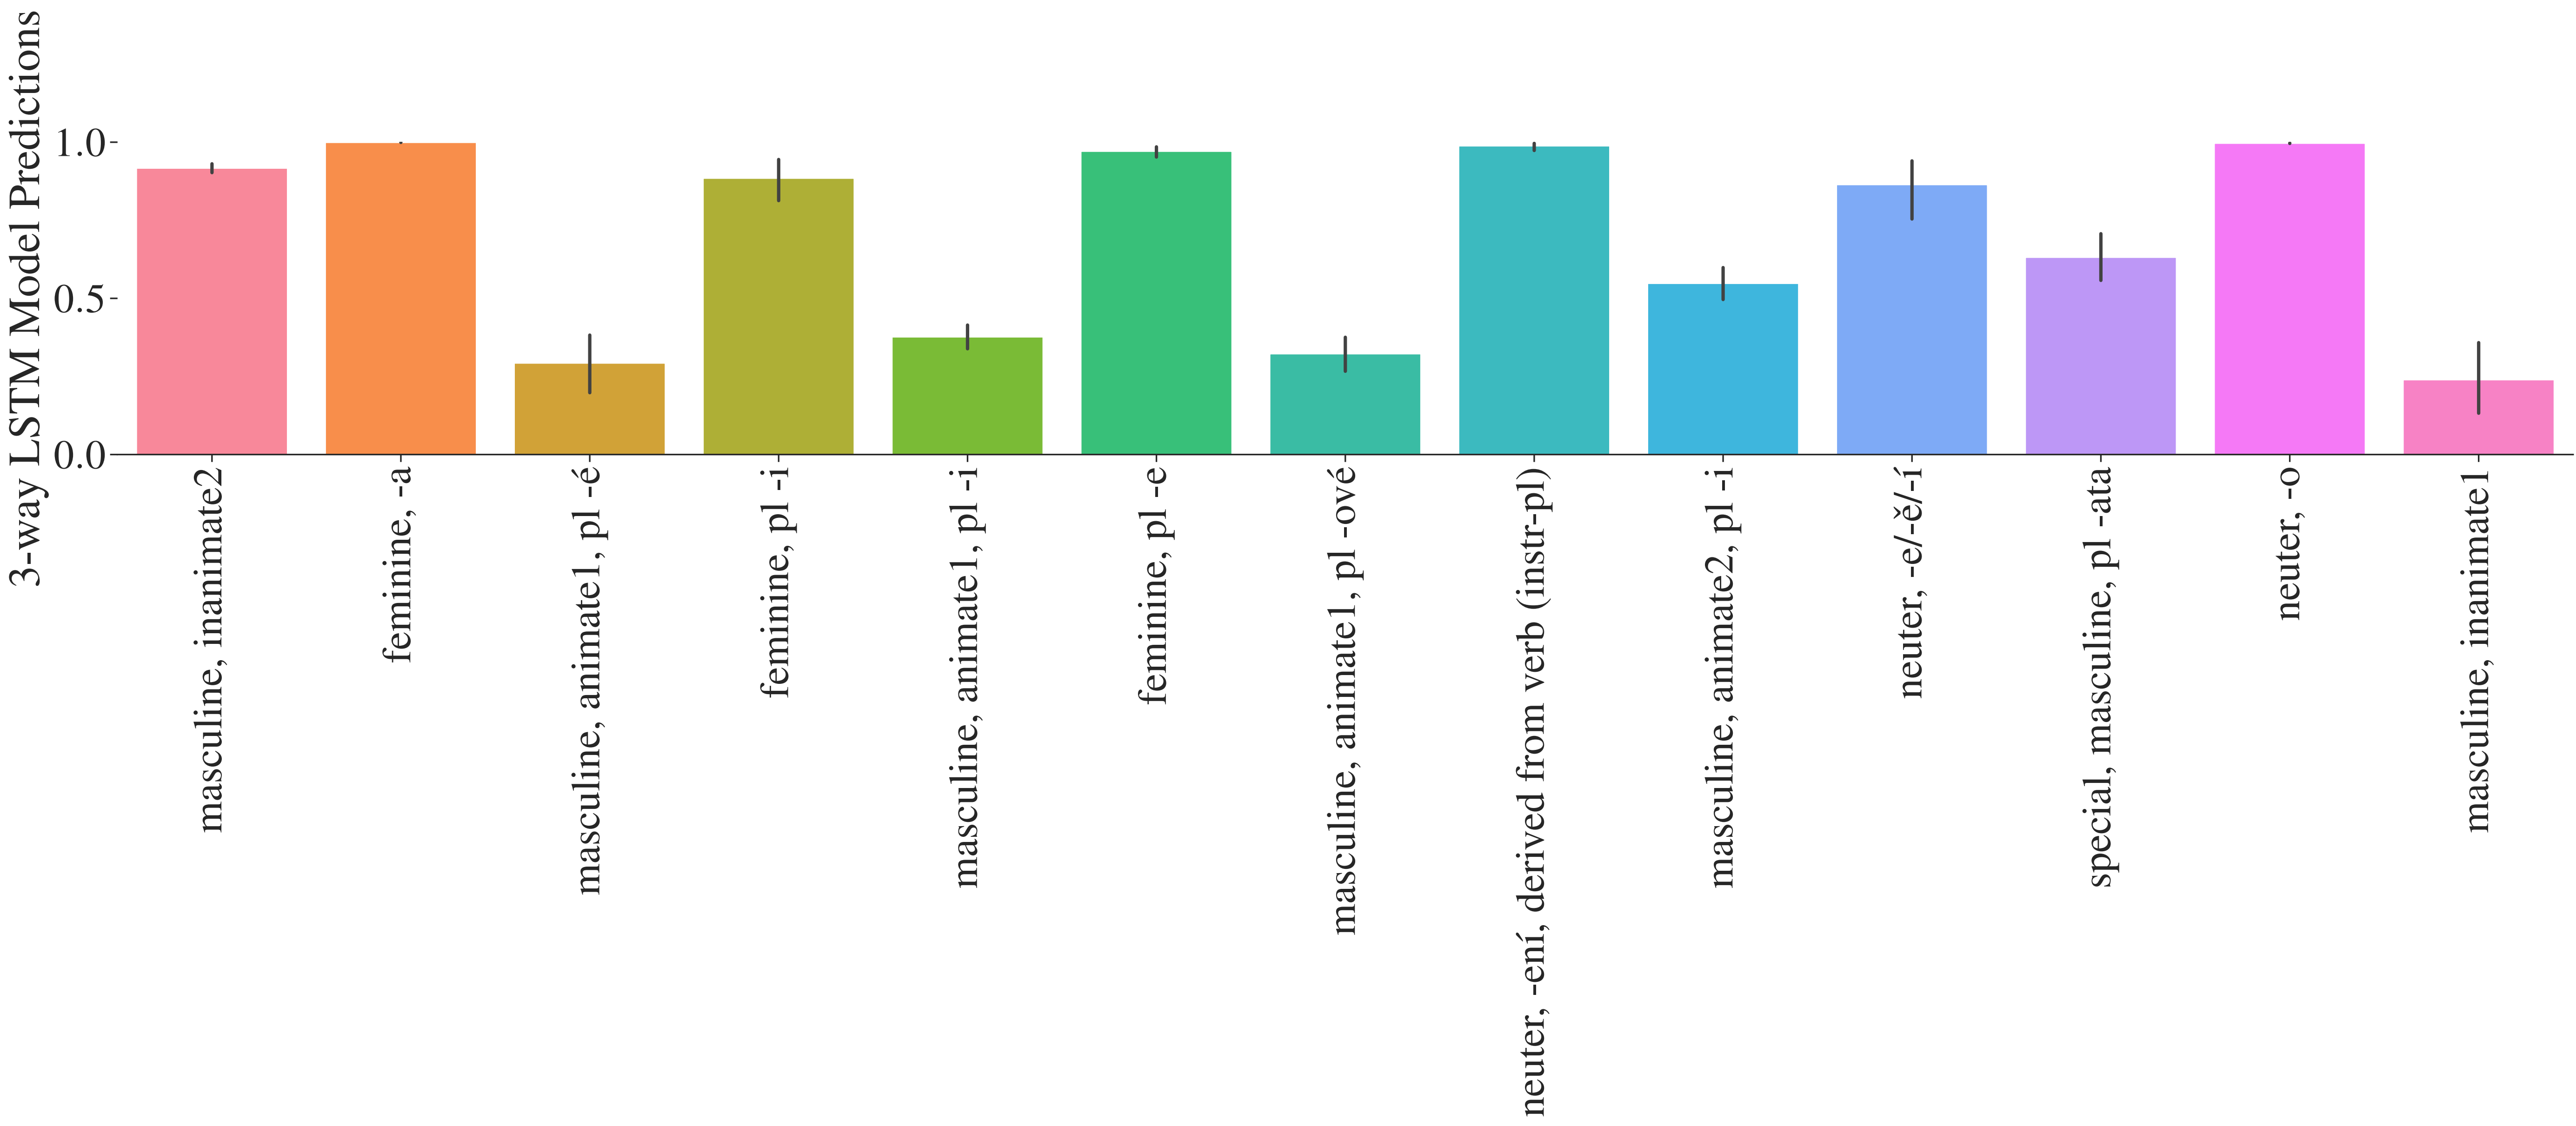

Supplement: Software [file Czeboth.pdf › figs/Czeboth.pdf]

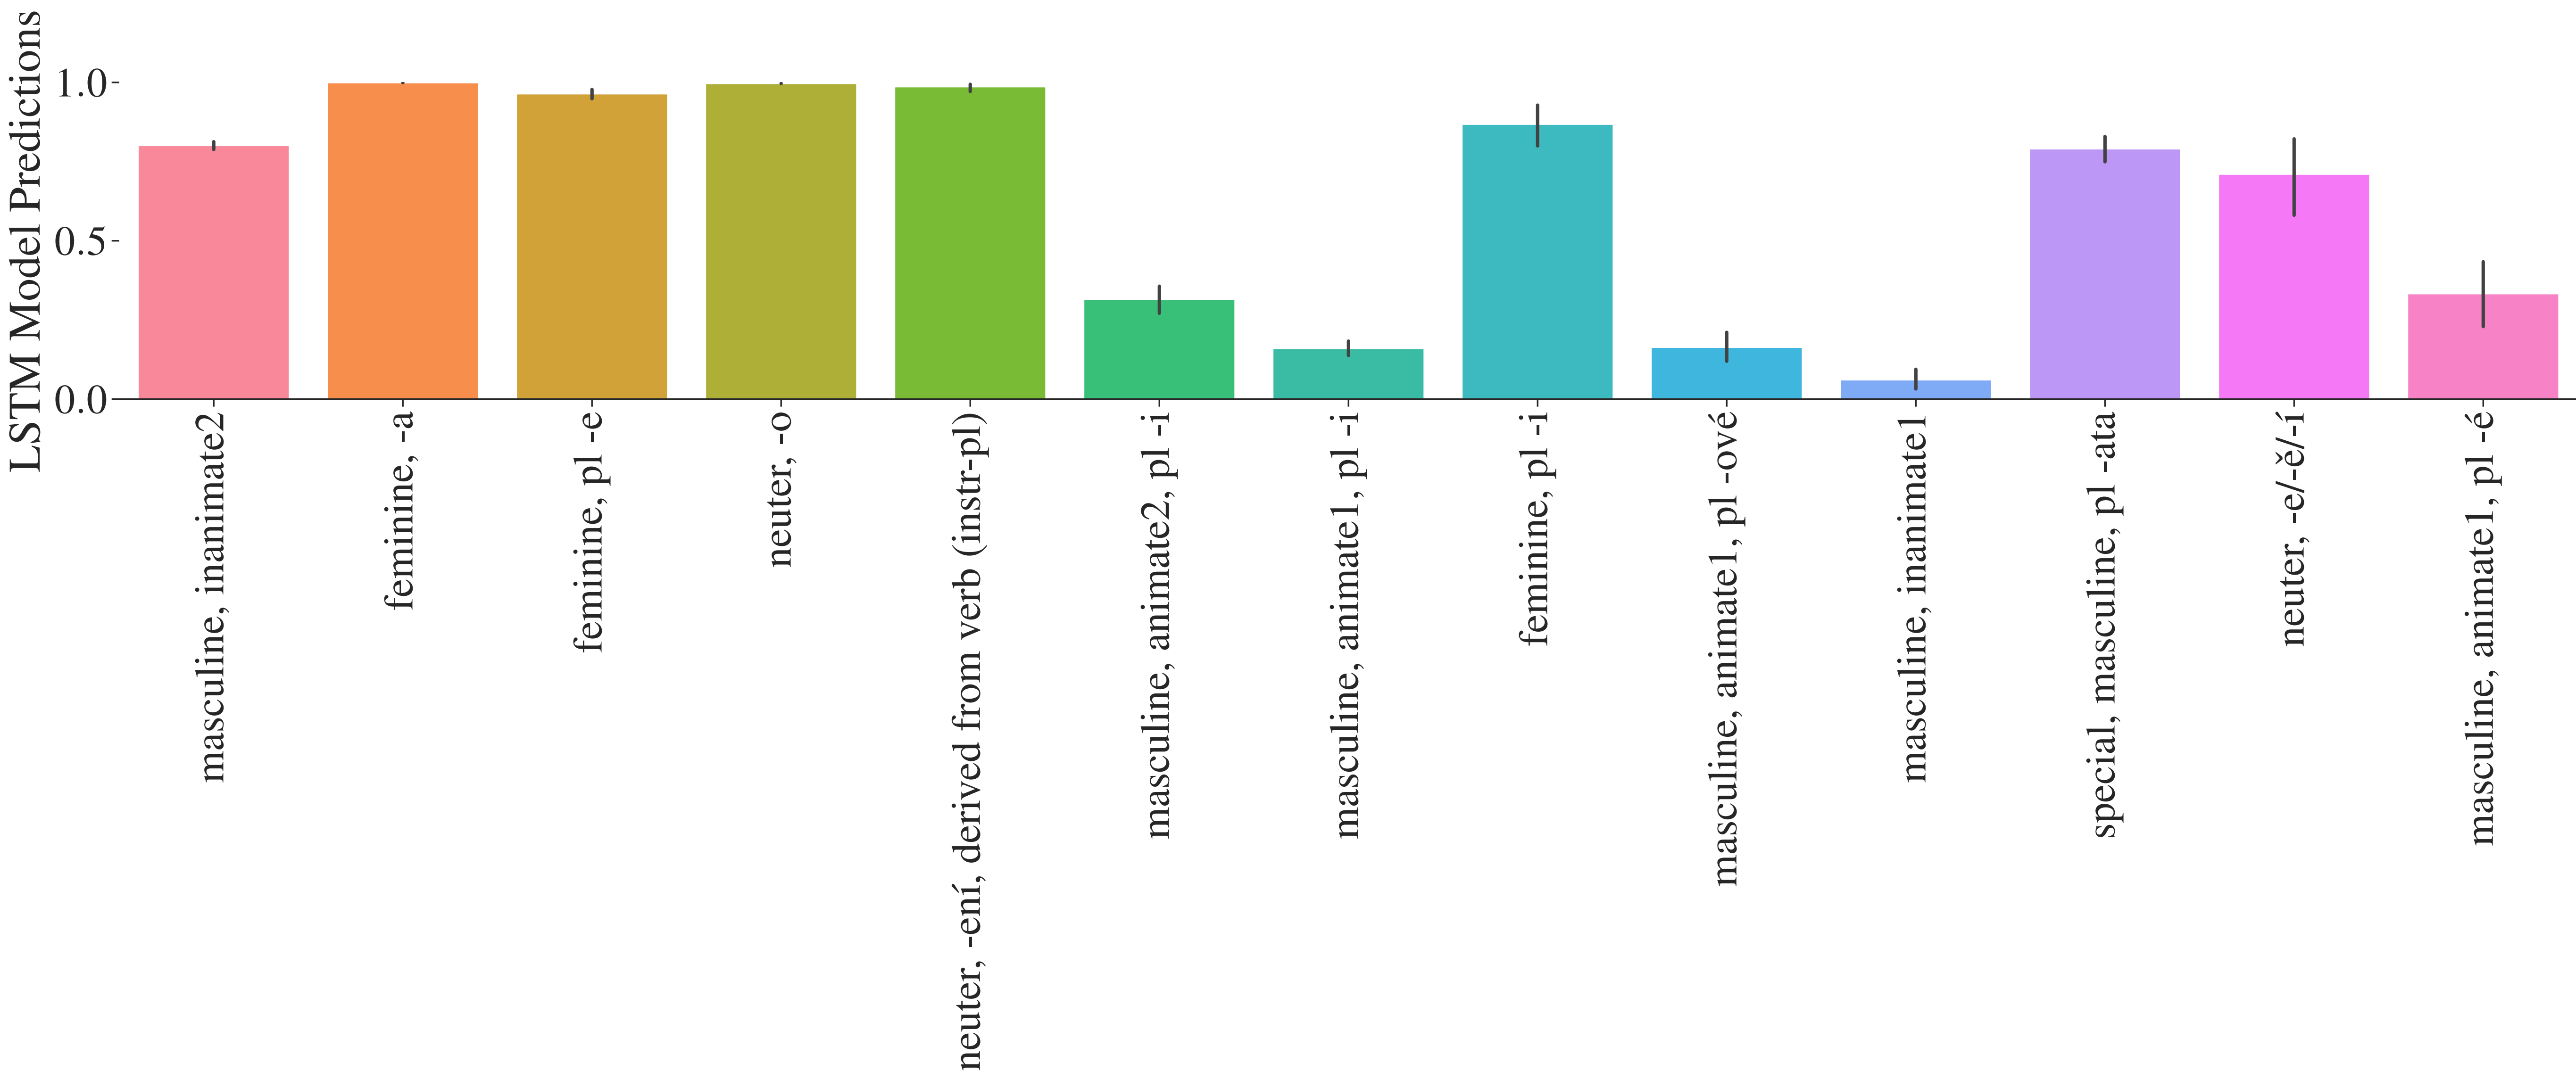

Supplement: Software [file Czeform.pdf › figs/Czeform.pdf]

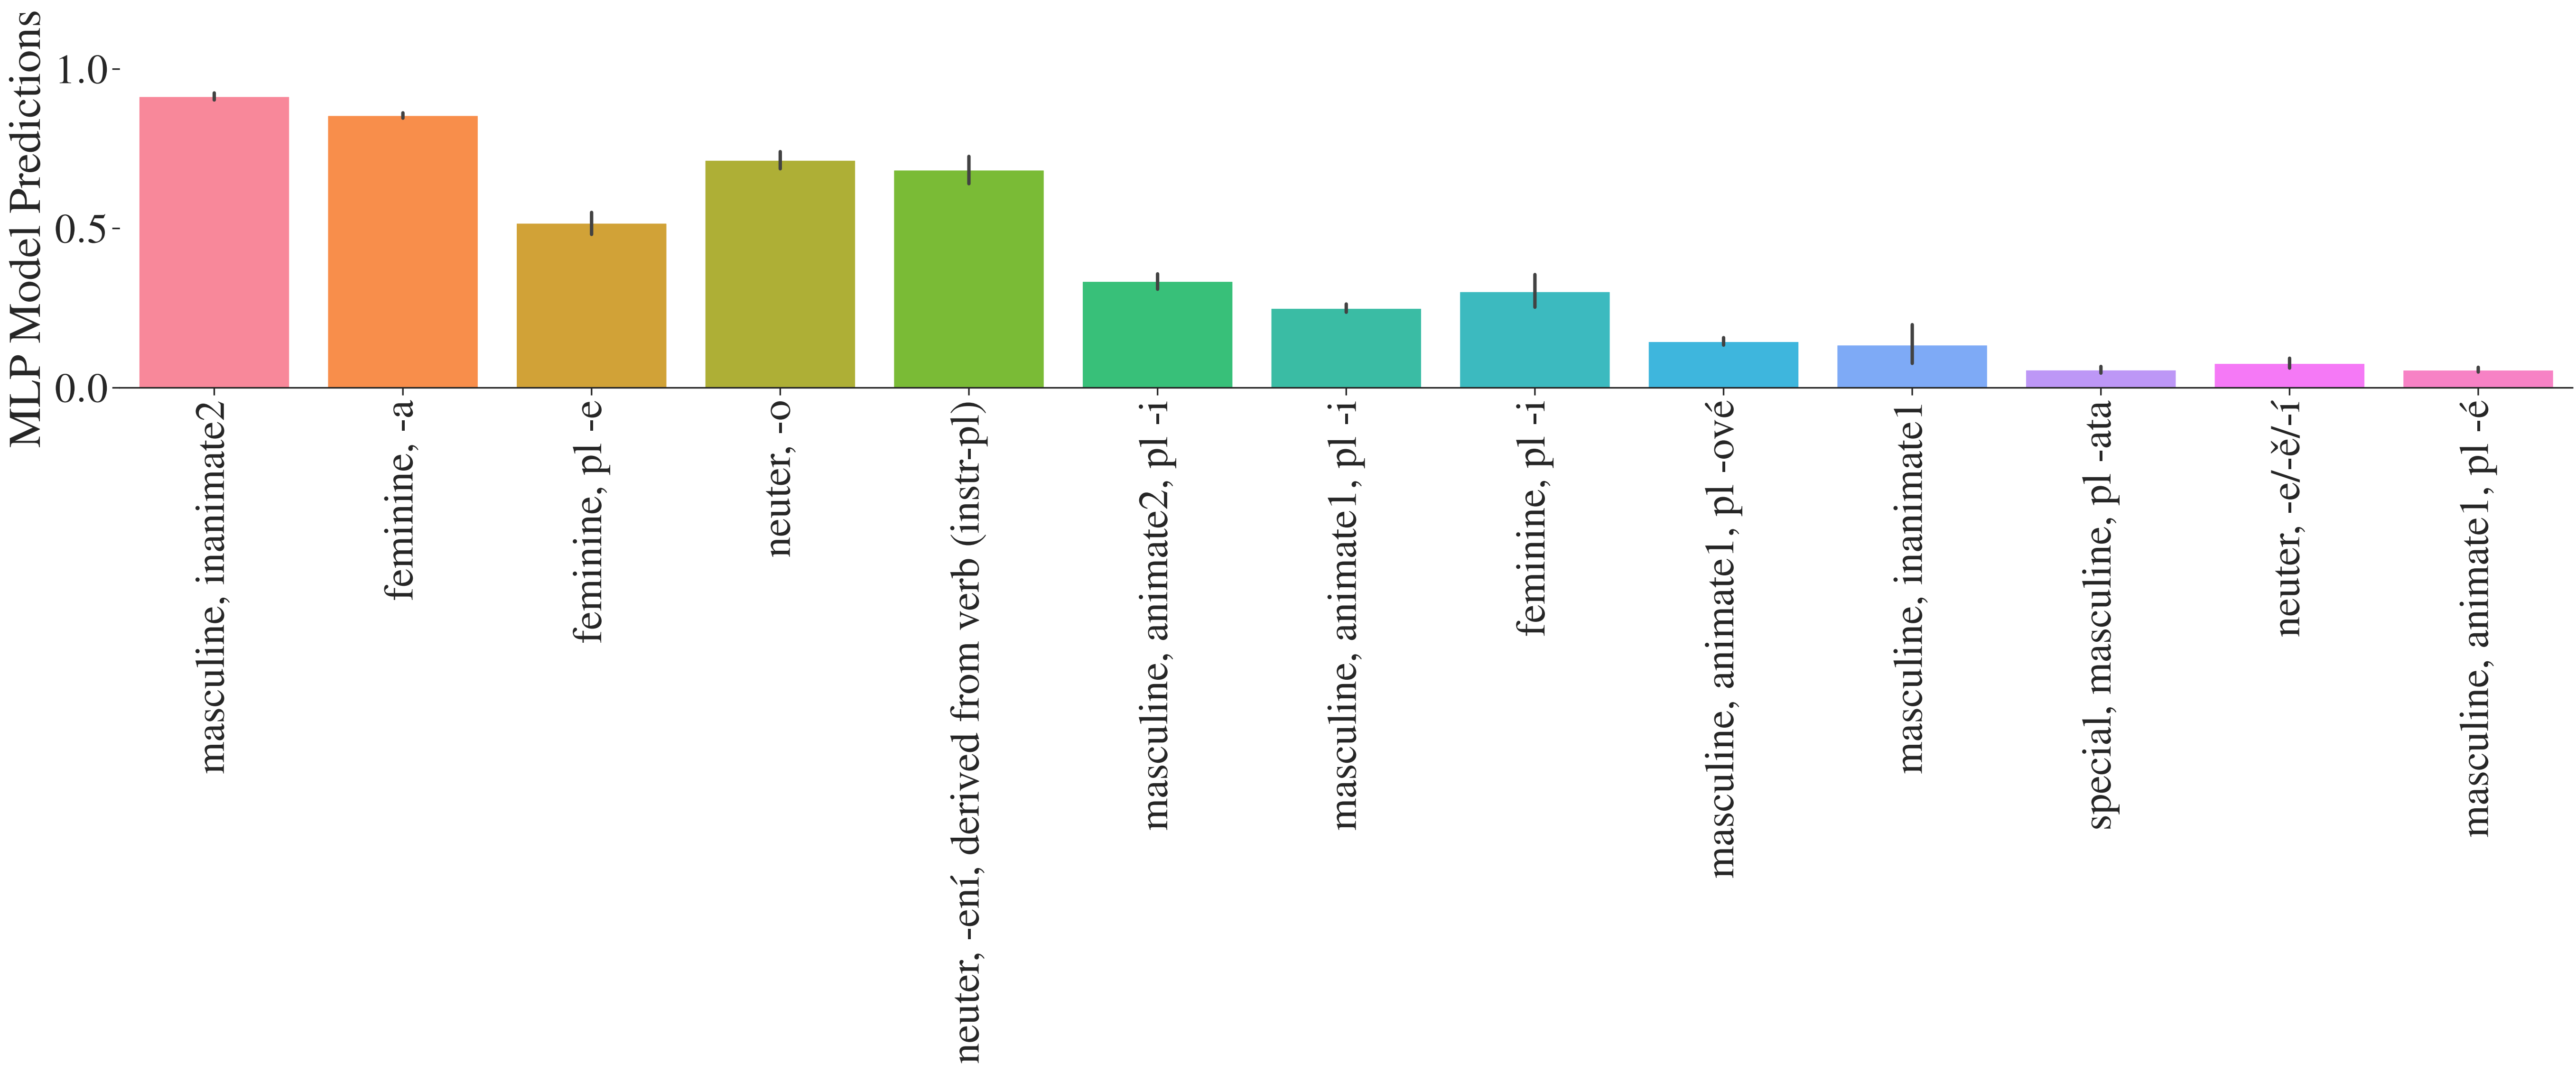

Supplement: Software [file Czemean.pdf › figs/Czemean.pdf]

LSTM Model Predictions

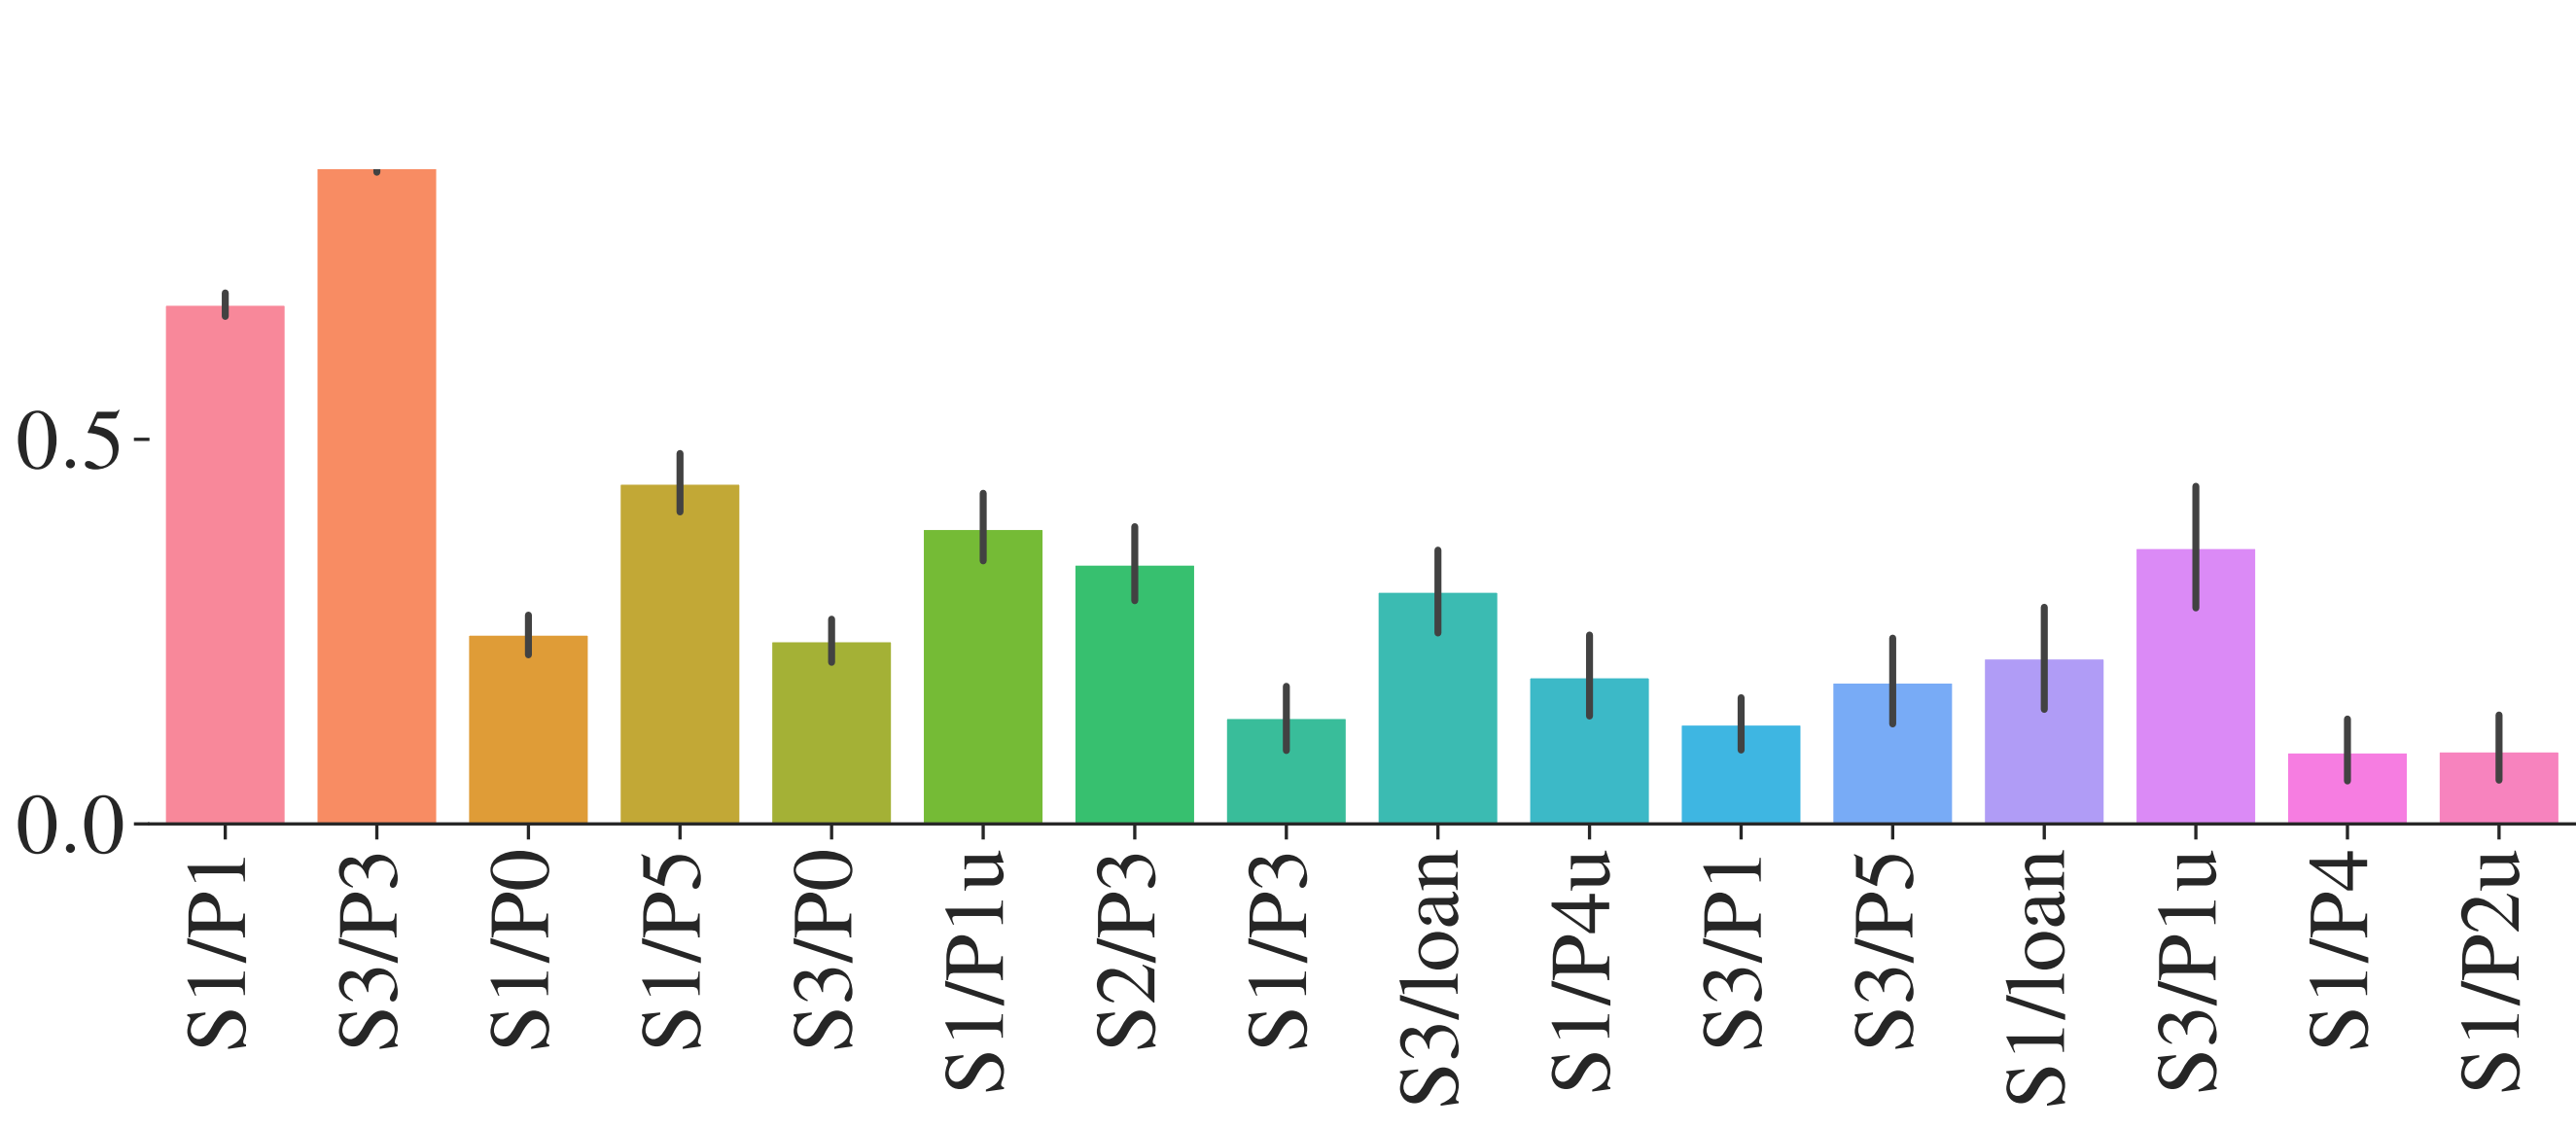

Supplement: Software [file GerNboth.pdf › figs/GerNboth.pdf]

LSTM Model Predictions

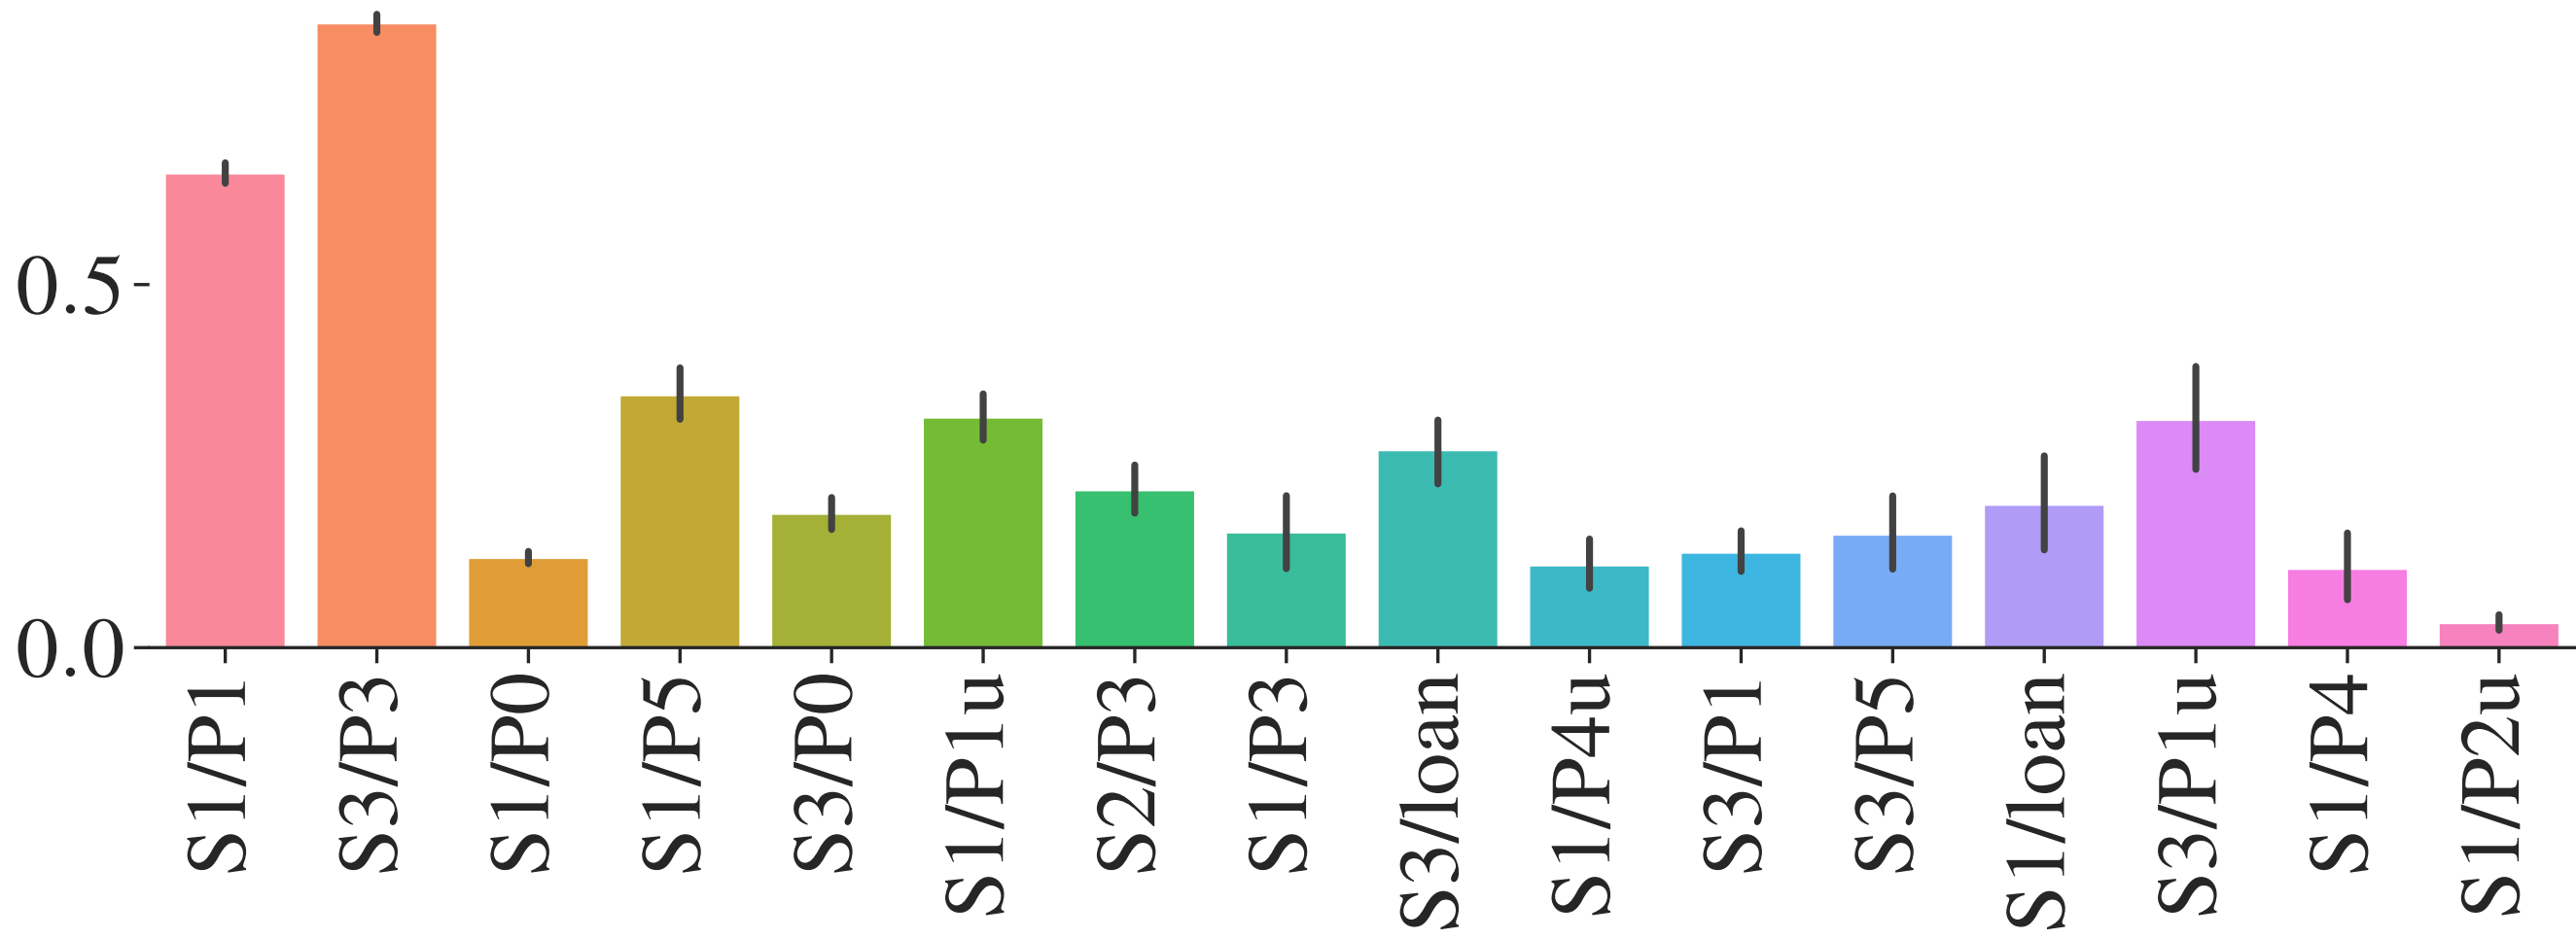

Supplement: Software [file GerNform.pdf › figs/GerNform.pdf]

MLP Model Predictions

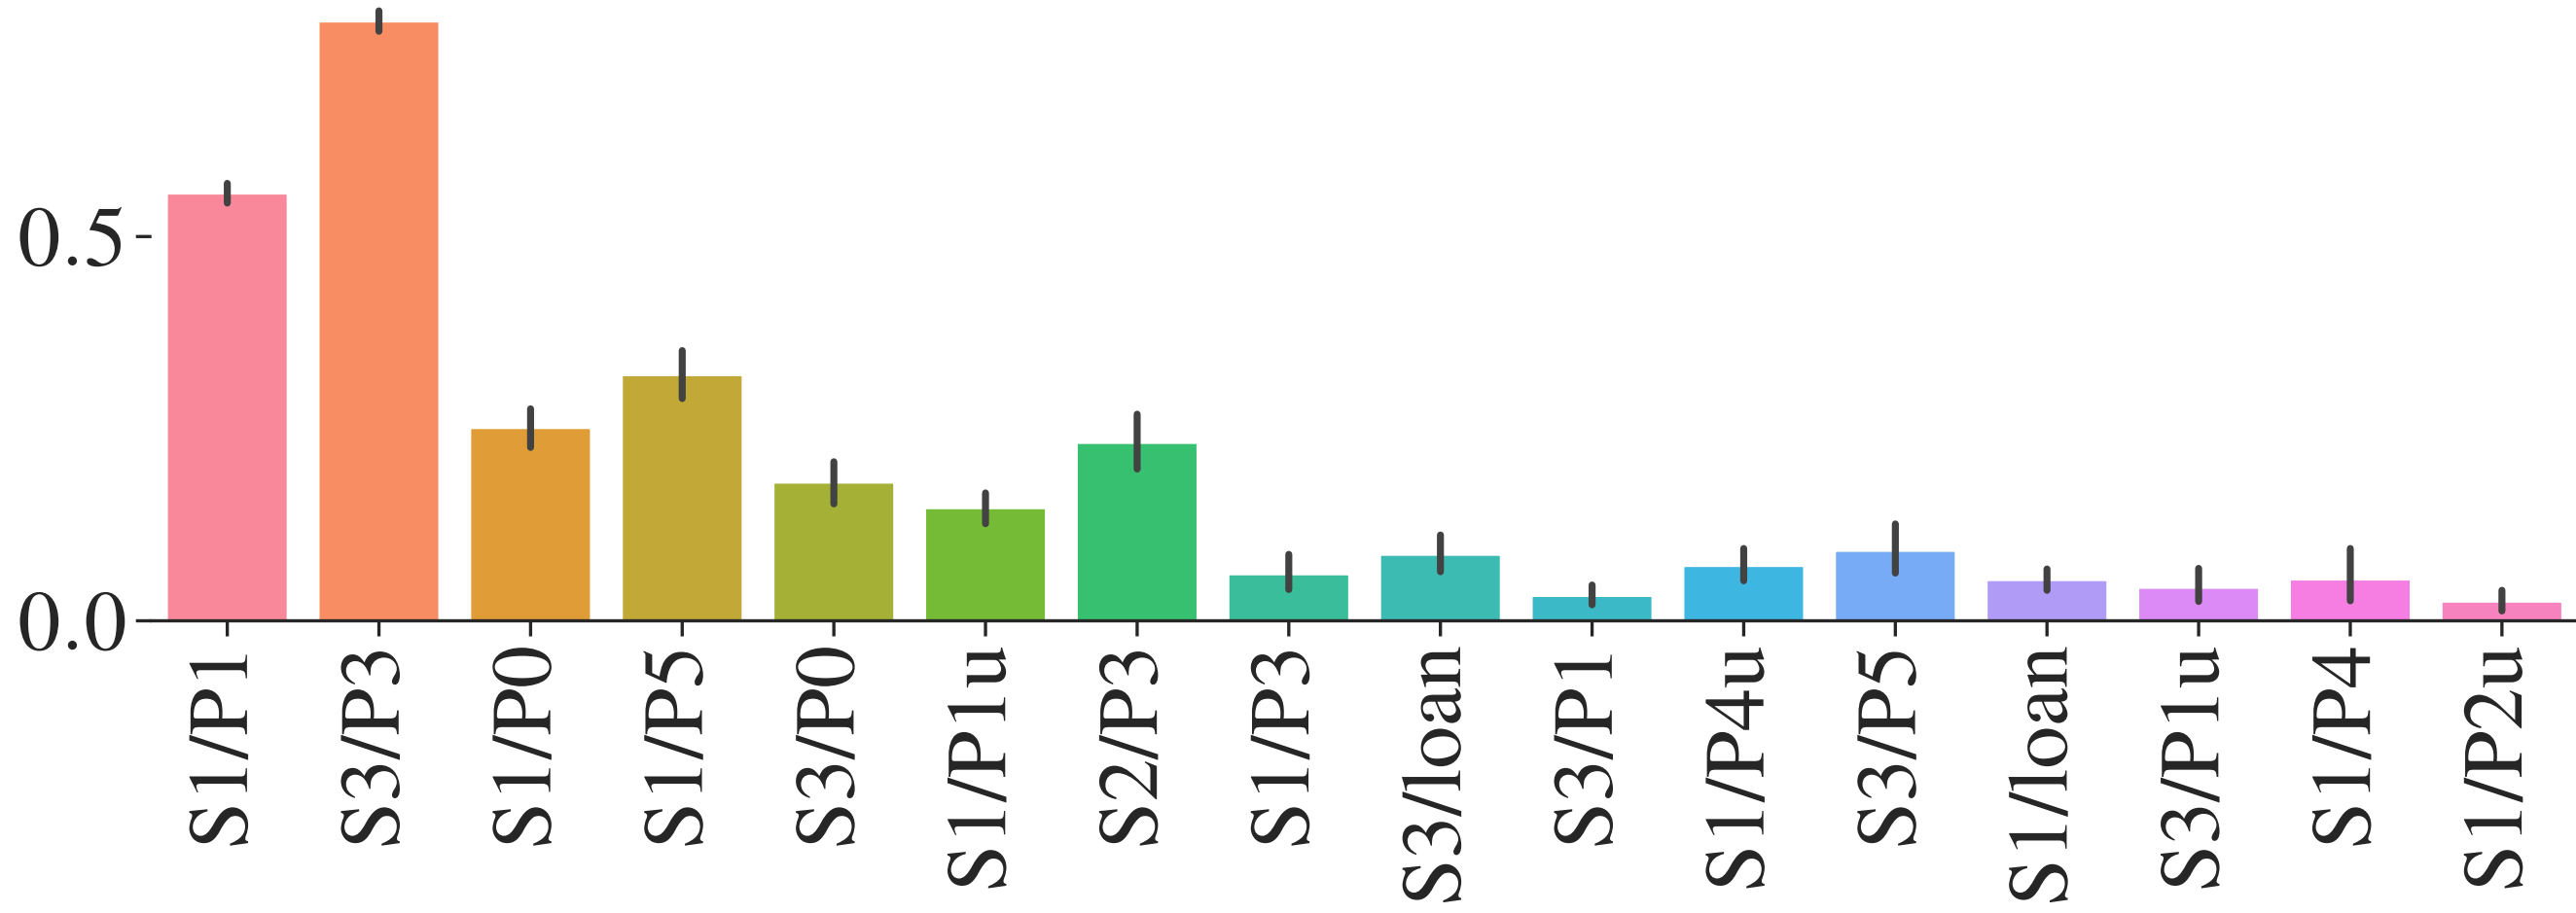

Supplement: Software [file GerNmean.pdf › figs/GerNmean.pdf]

Meaning

Form

Tripartite

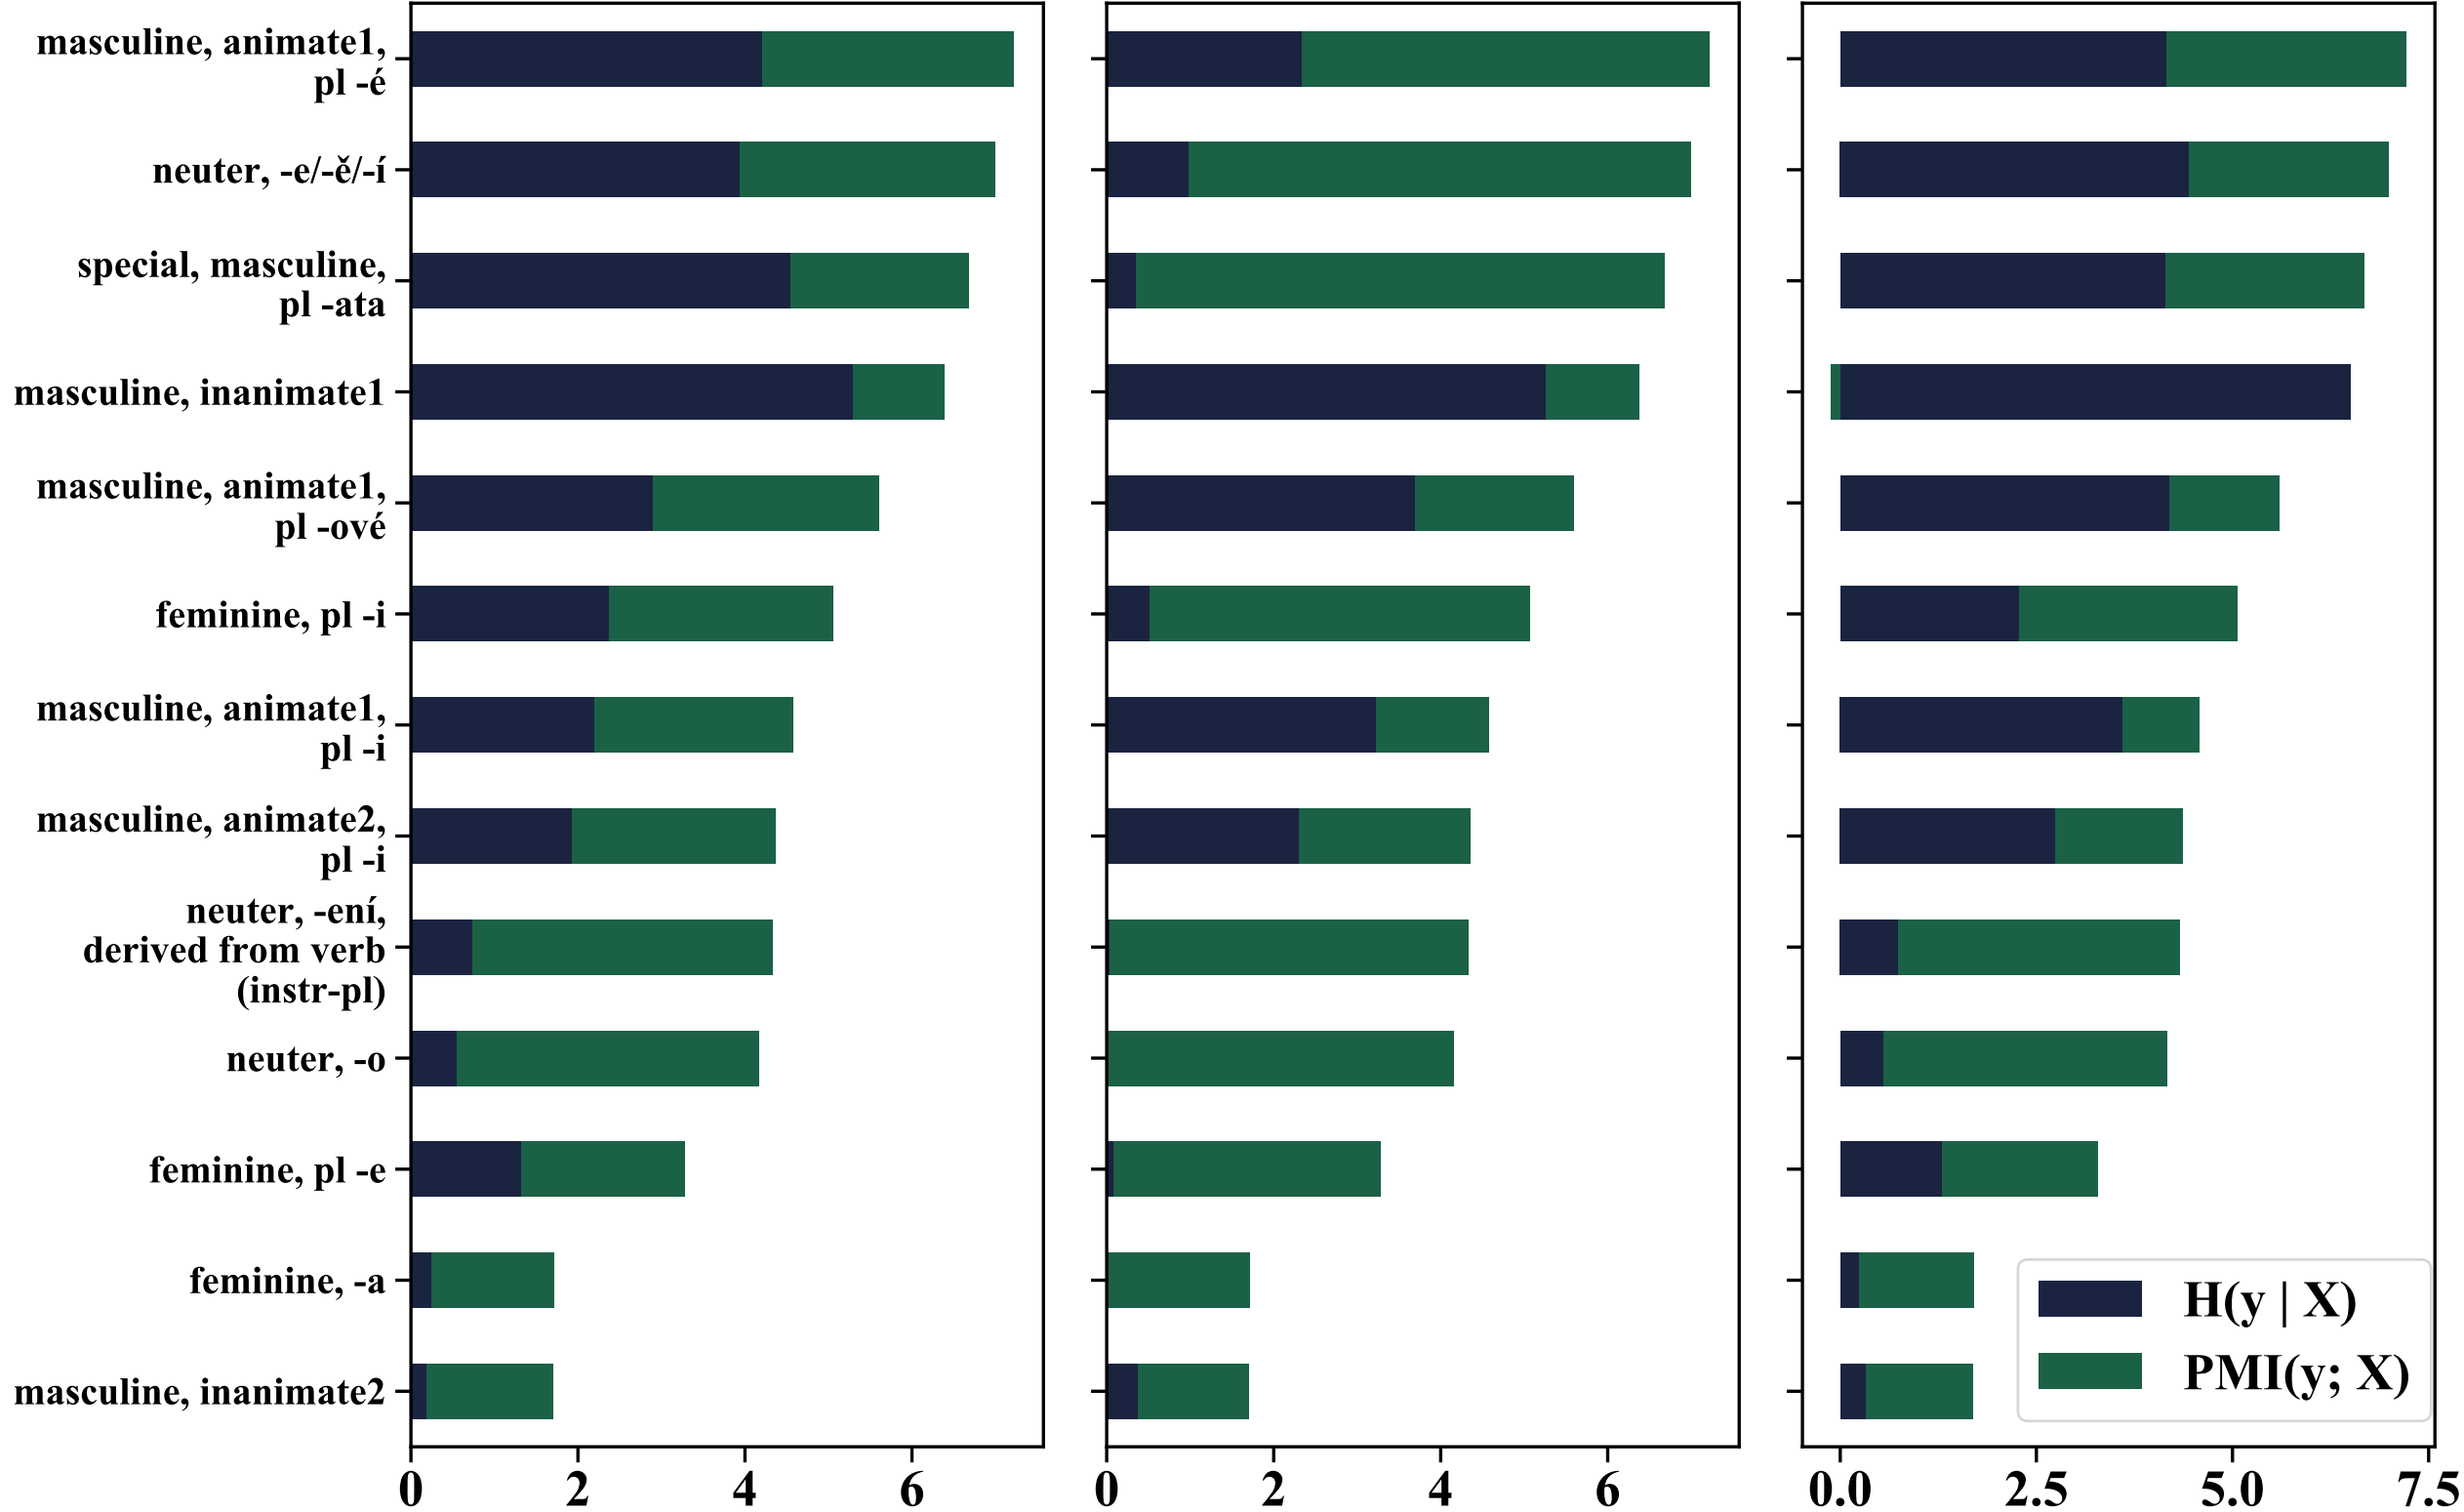

Supplement: Software [file PMI_cze.pdf › figs/PMI_cze.pdf]

Meaning

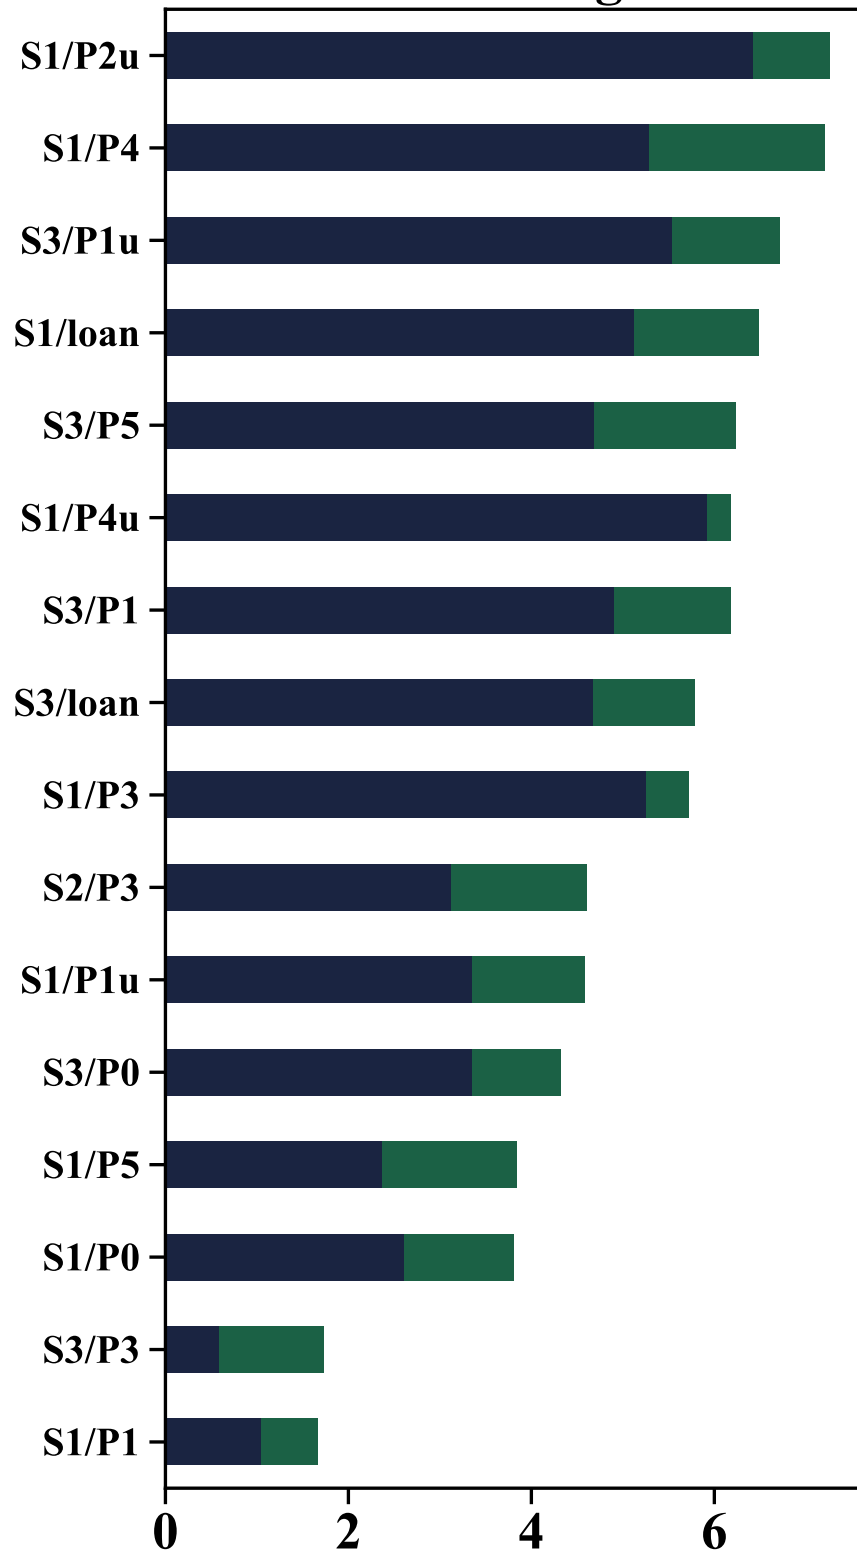

Form

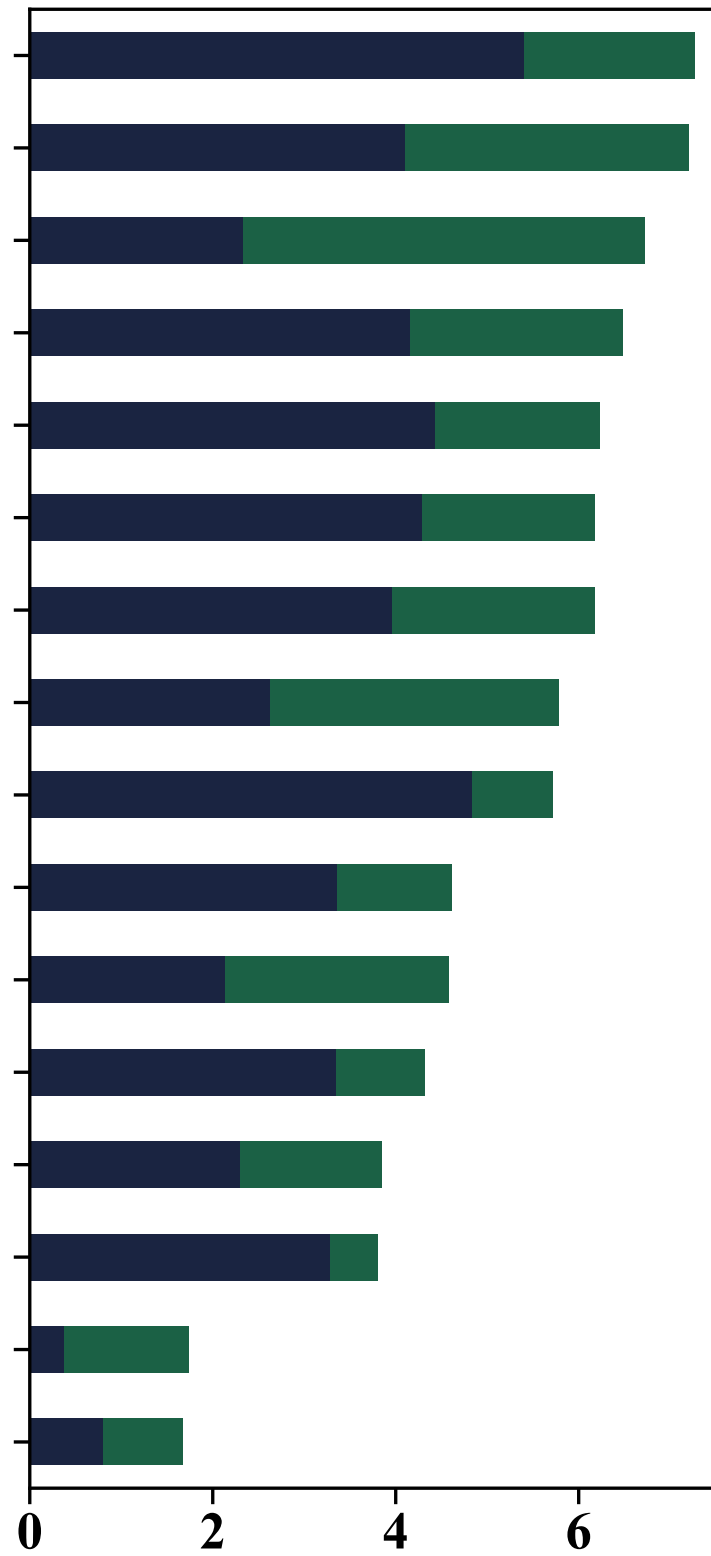

Tripartite

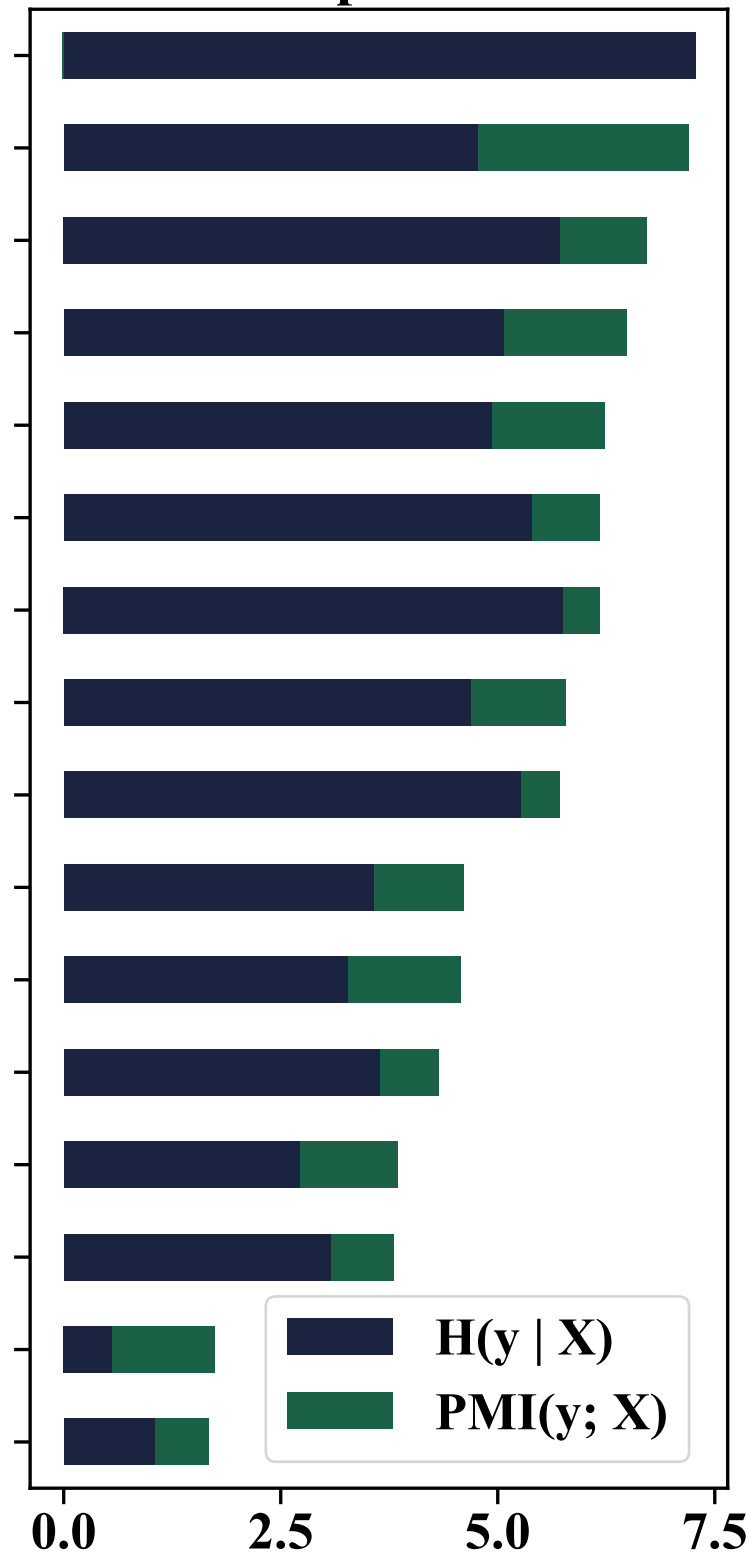

$H(y | X)$   
 $PMI(y; X)$

Supplement: Software [file PMI_ger_n.pdf › figs/PMI_ger_n.pdf]

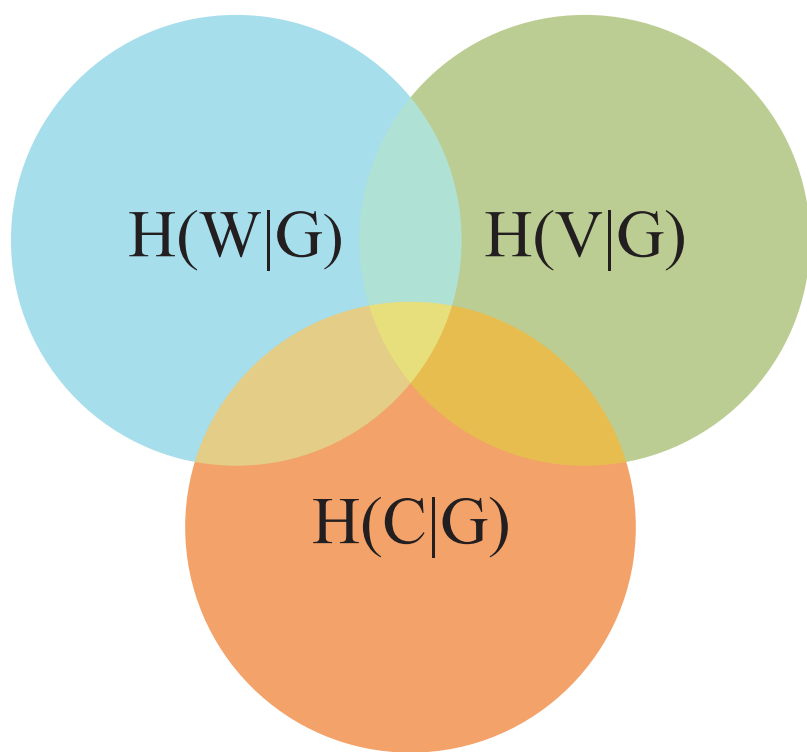

|              |                                                                                     | German | Czech |
|--------------|-------------------------------------------------------------------------------------|--------|-------|
| $H(C G)$     |  | 2.17   | 1.35  |
| $I(C;W G)$   |  | 0.57   | 0.79  |
| $I(C;V G)$   |  | 0.29   | 0.53  |
| $I(C;W,V G)$ |  | 0.67   | 0.98  |
| $I(C;W;V G)$ |  | 0.20   | 0.35  |

Supplement: Software [file declension_first-page.pdf › figs/declension_first-page.pdf]

Meaning

Form

Both

Tripartite

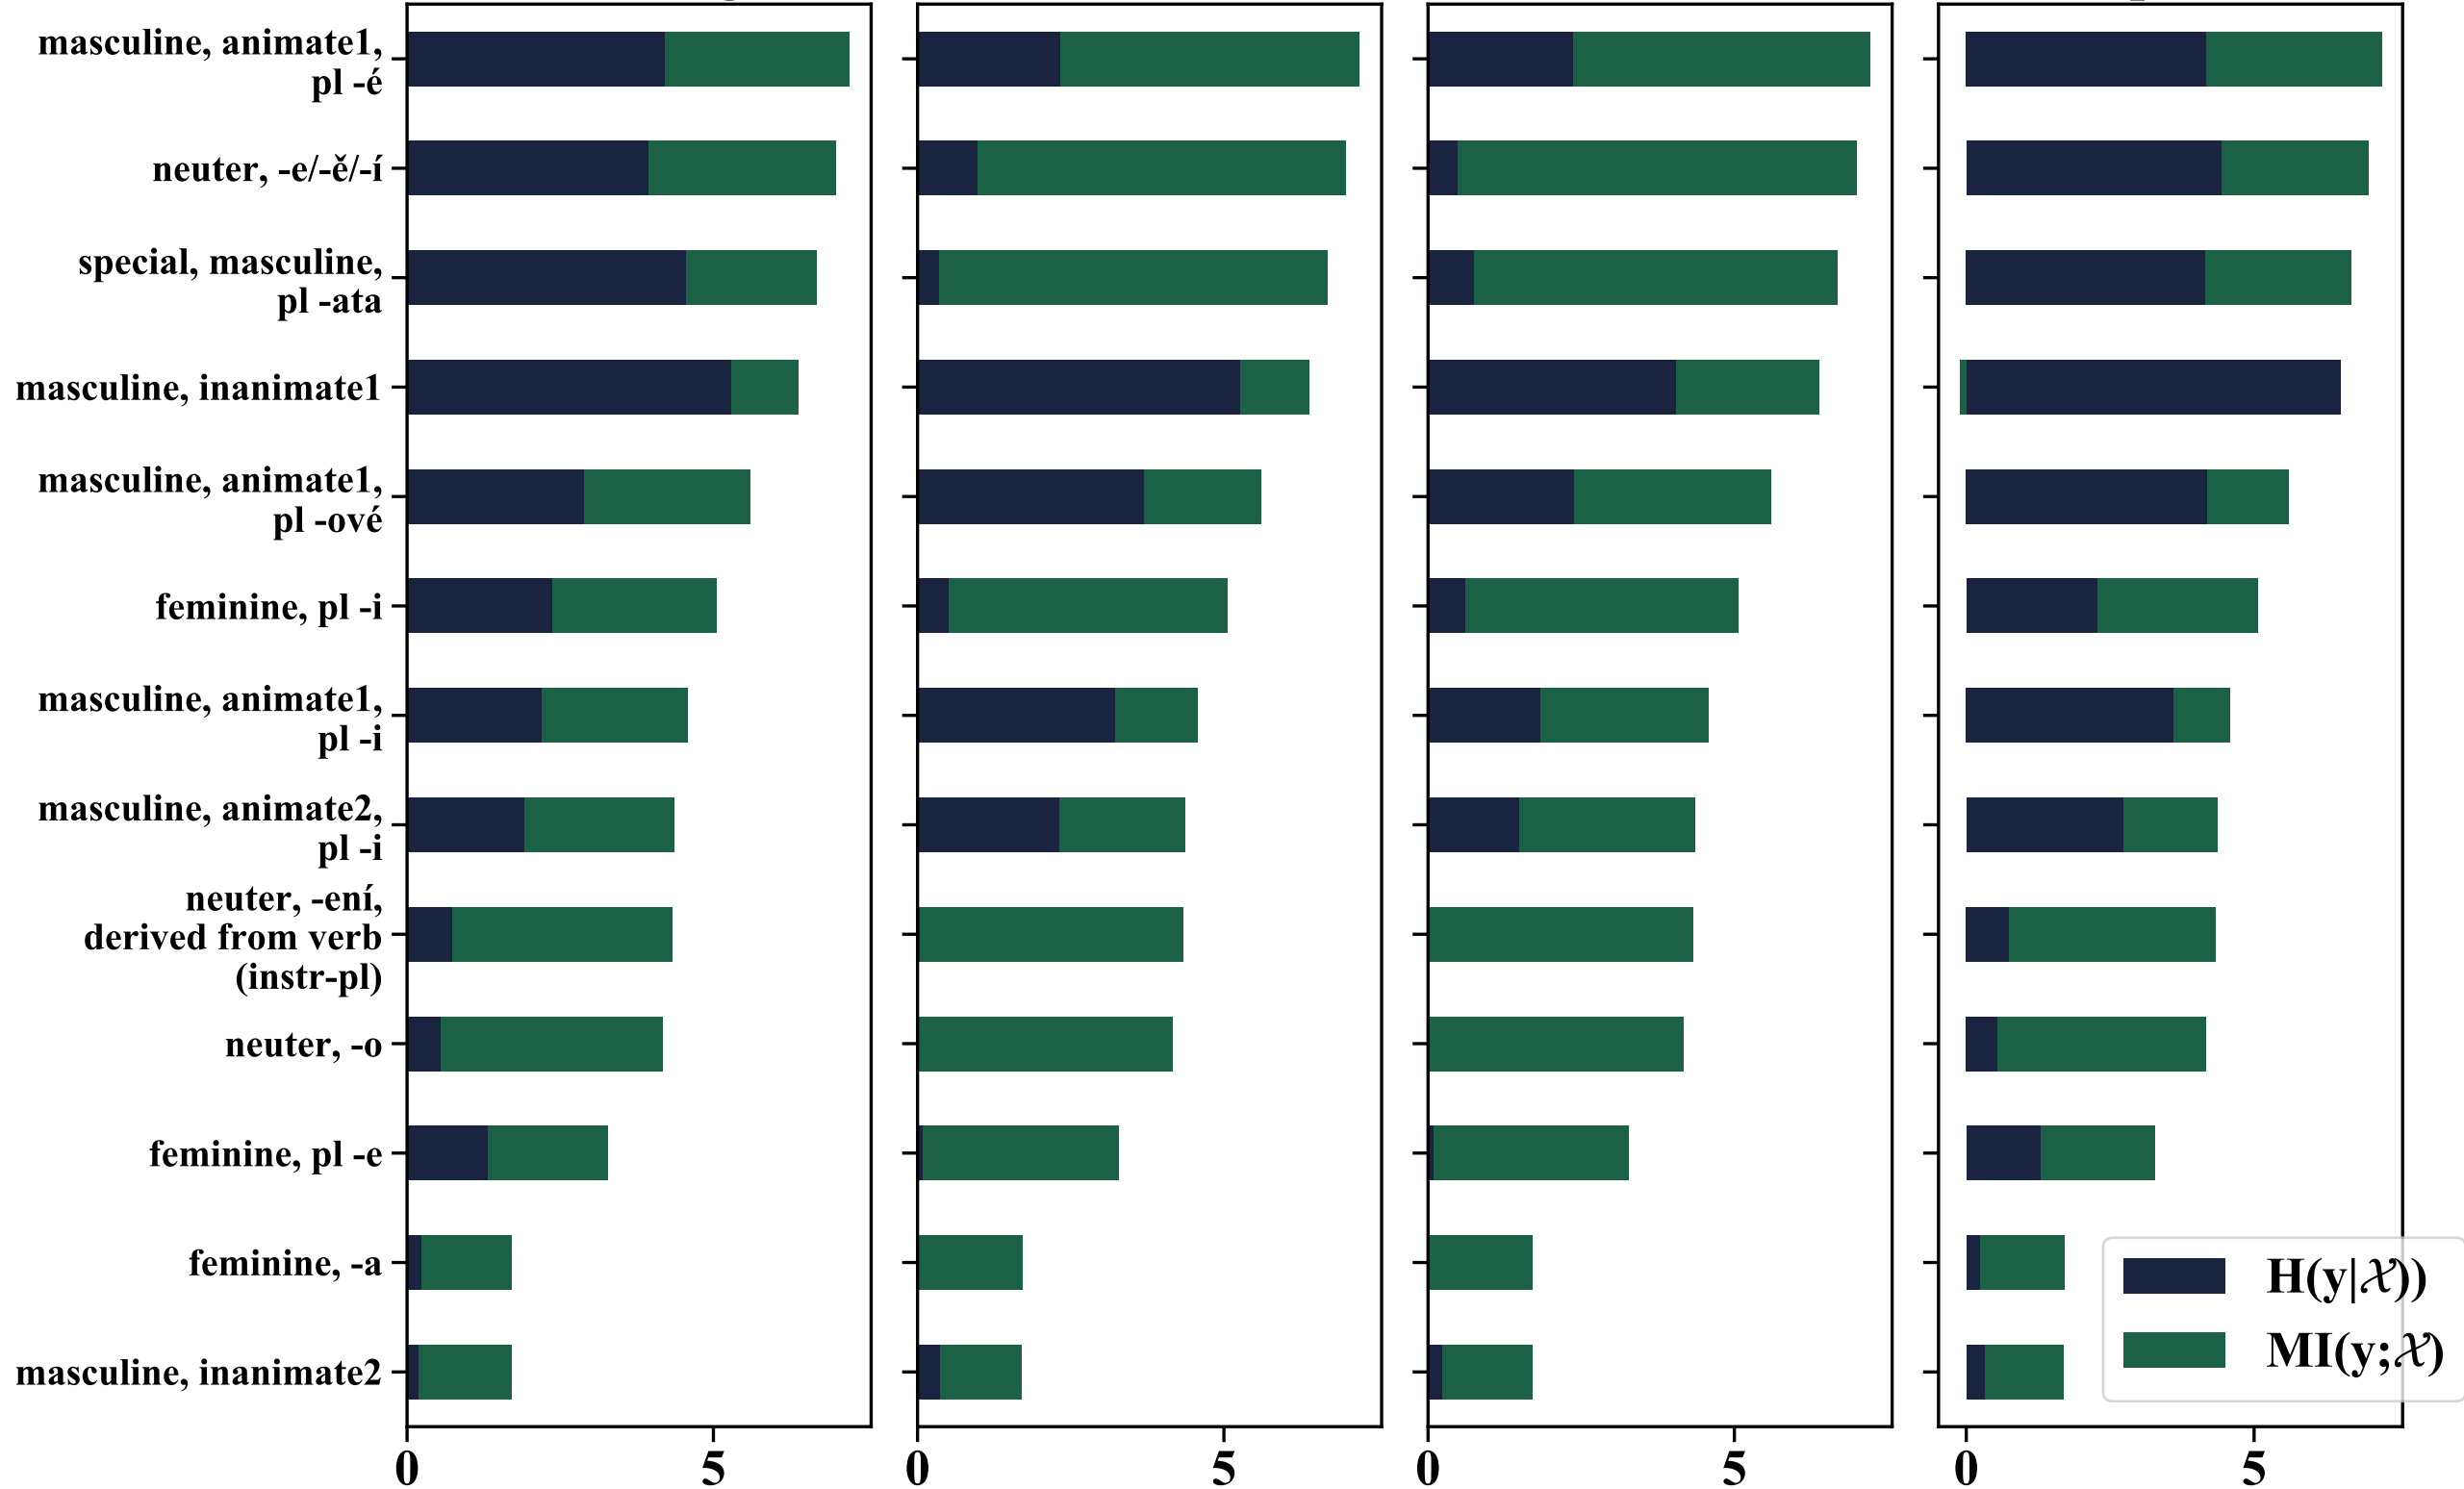

Supplement: Software [file pmi__cze__drop_h-first.pdf › figs/pmi__cze__drop_h-first.pdf]

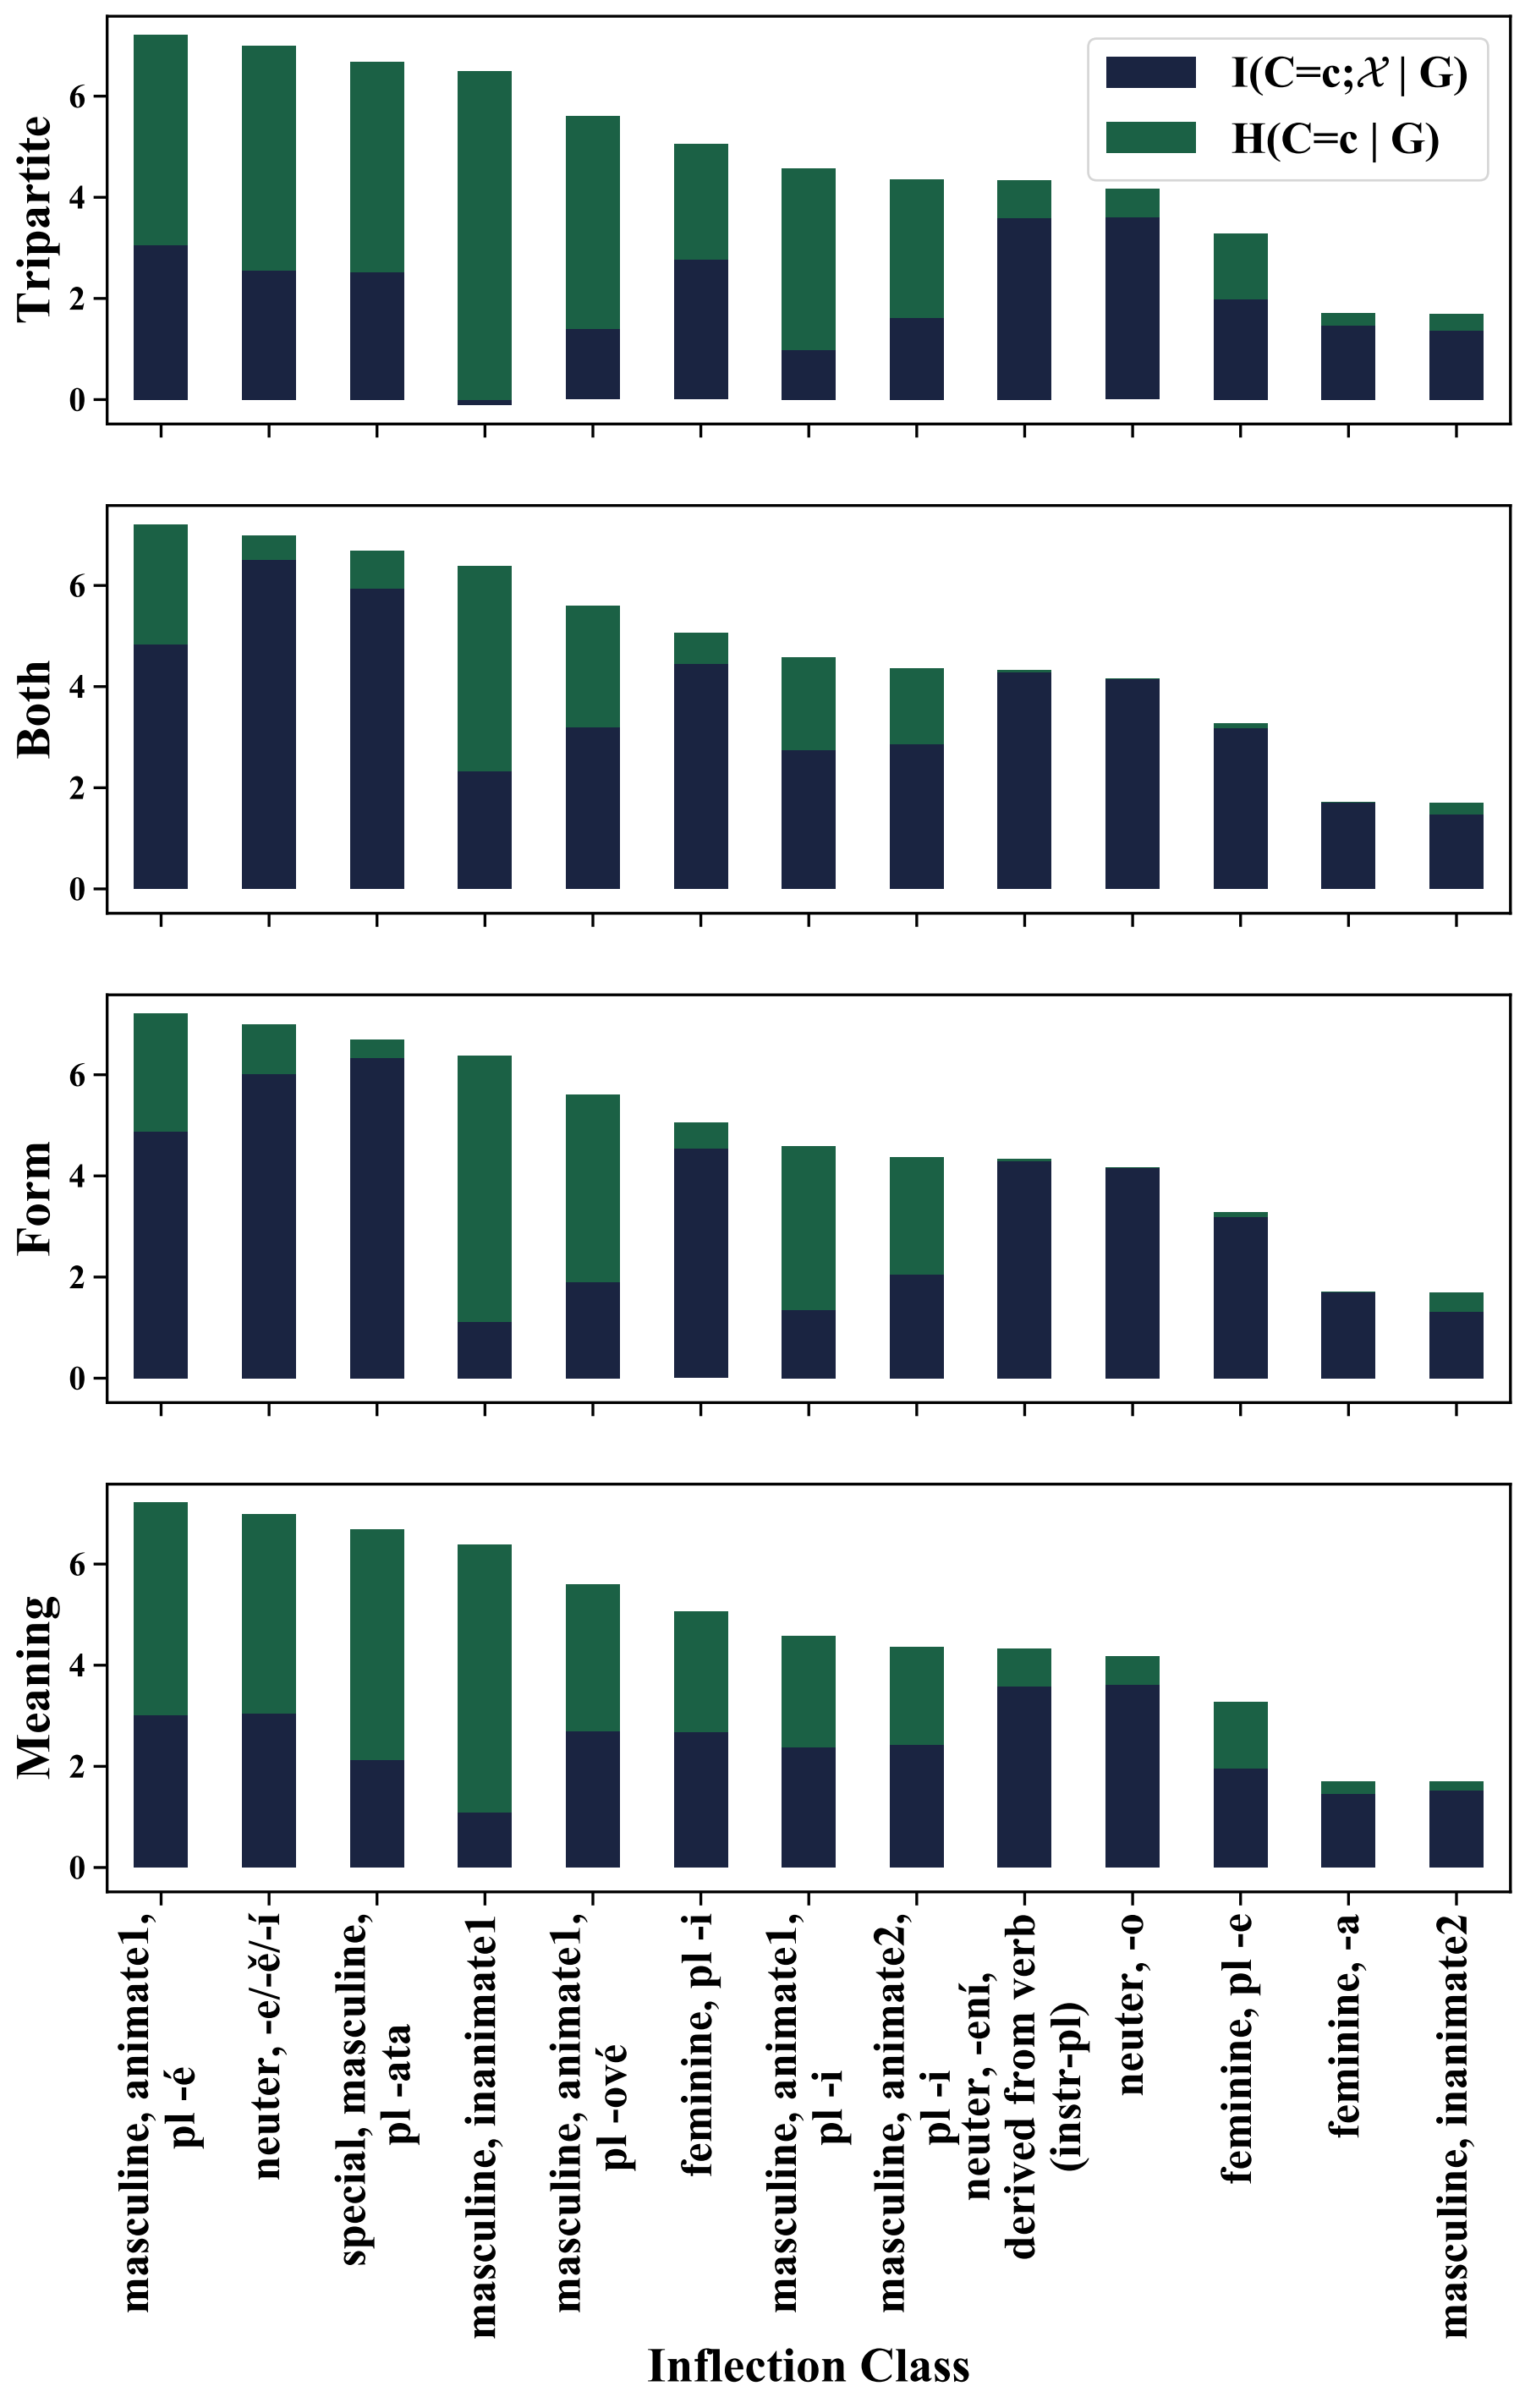

Supplement: Software [file pmi__cze__drop_mi-first.pdf › figs/pmi__cze__drop_mi-first.pdf]

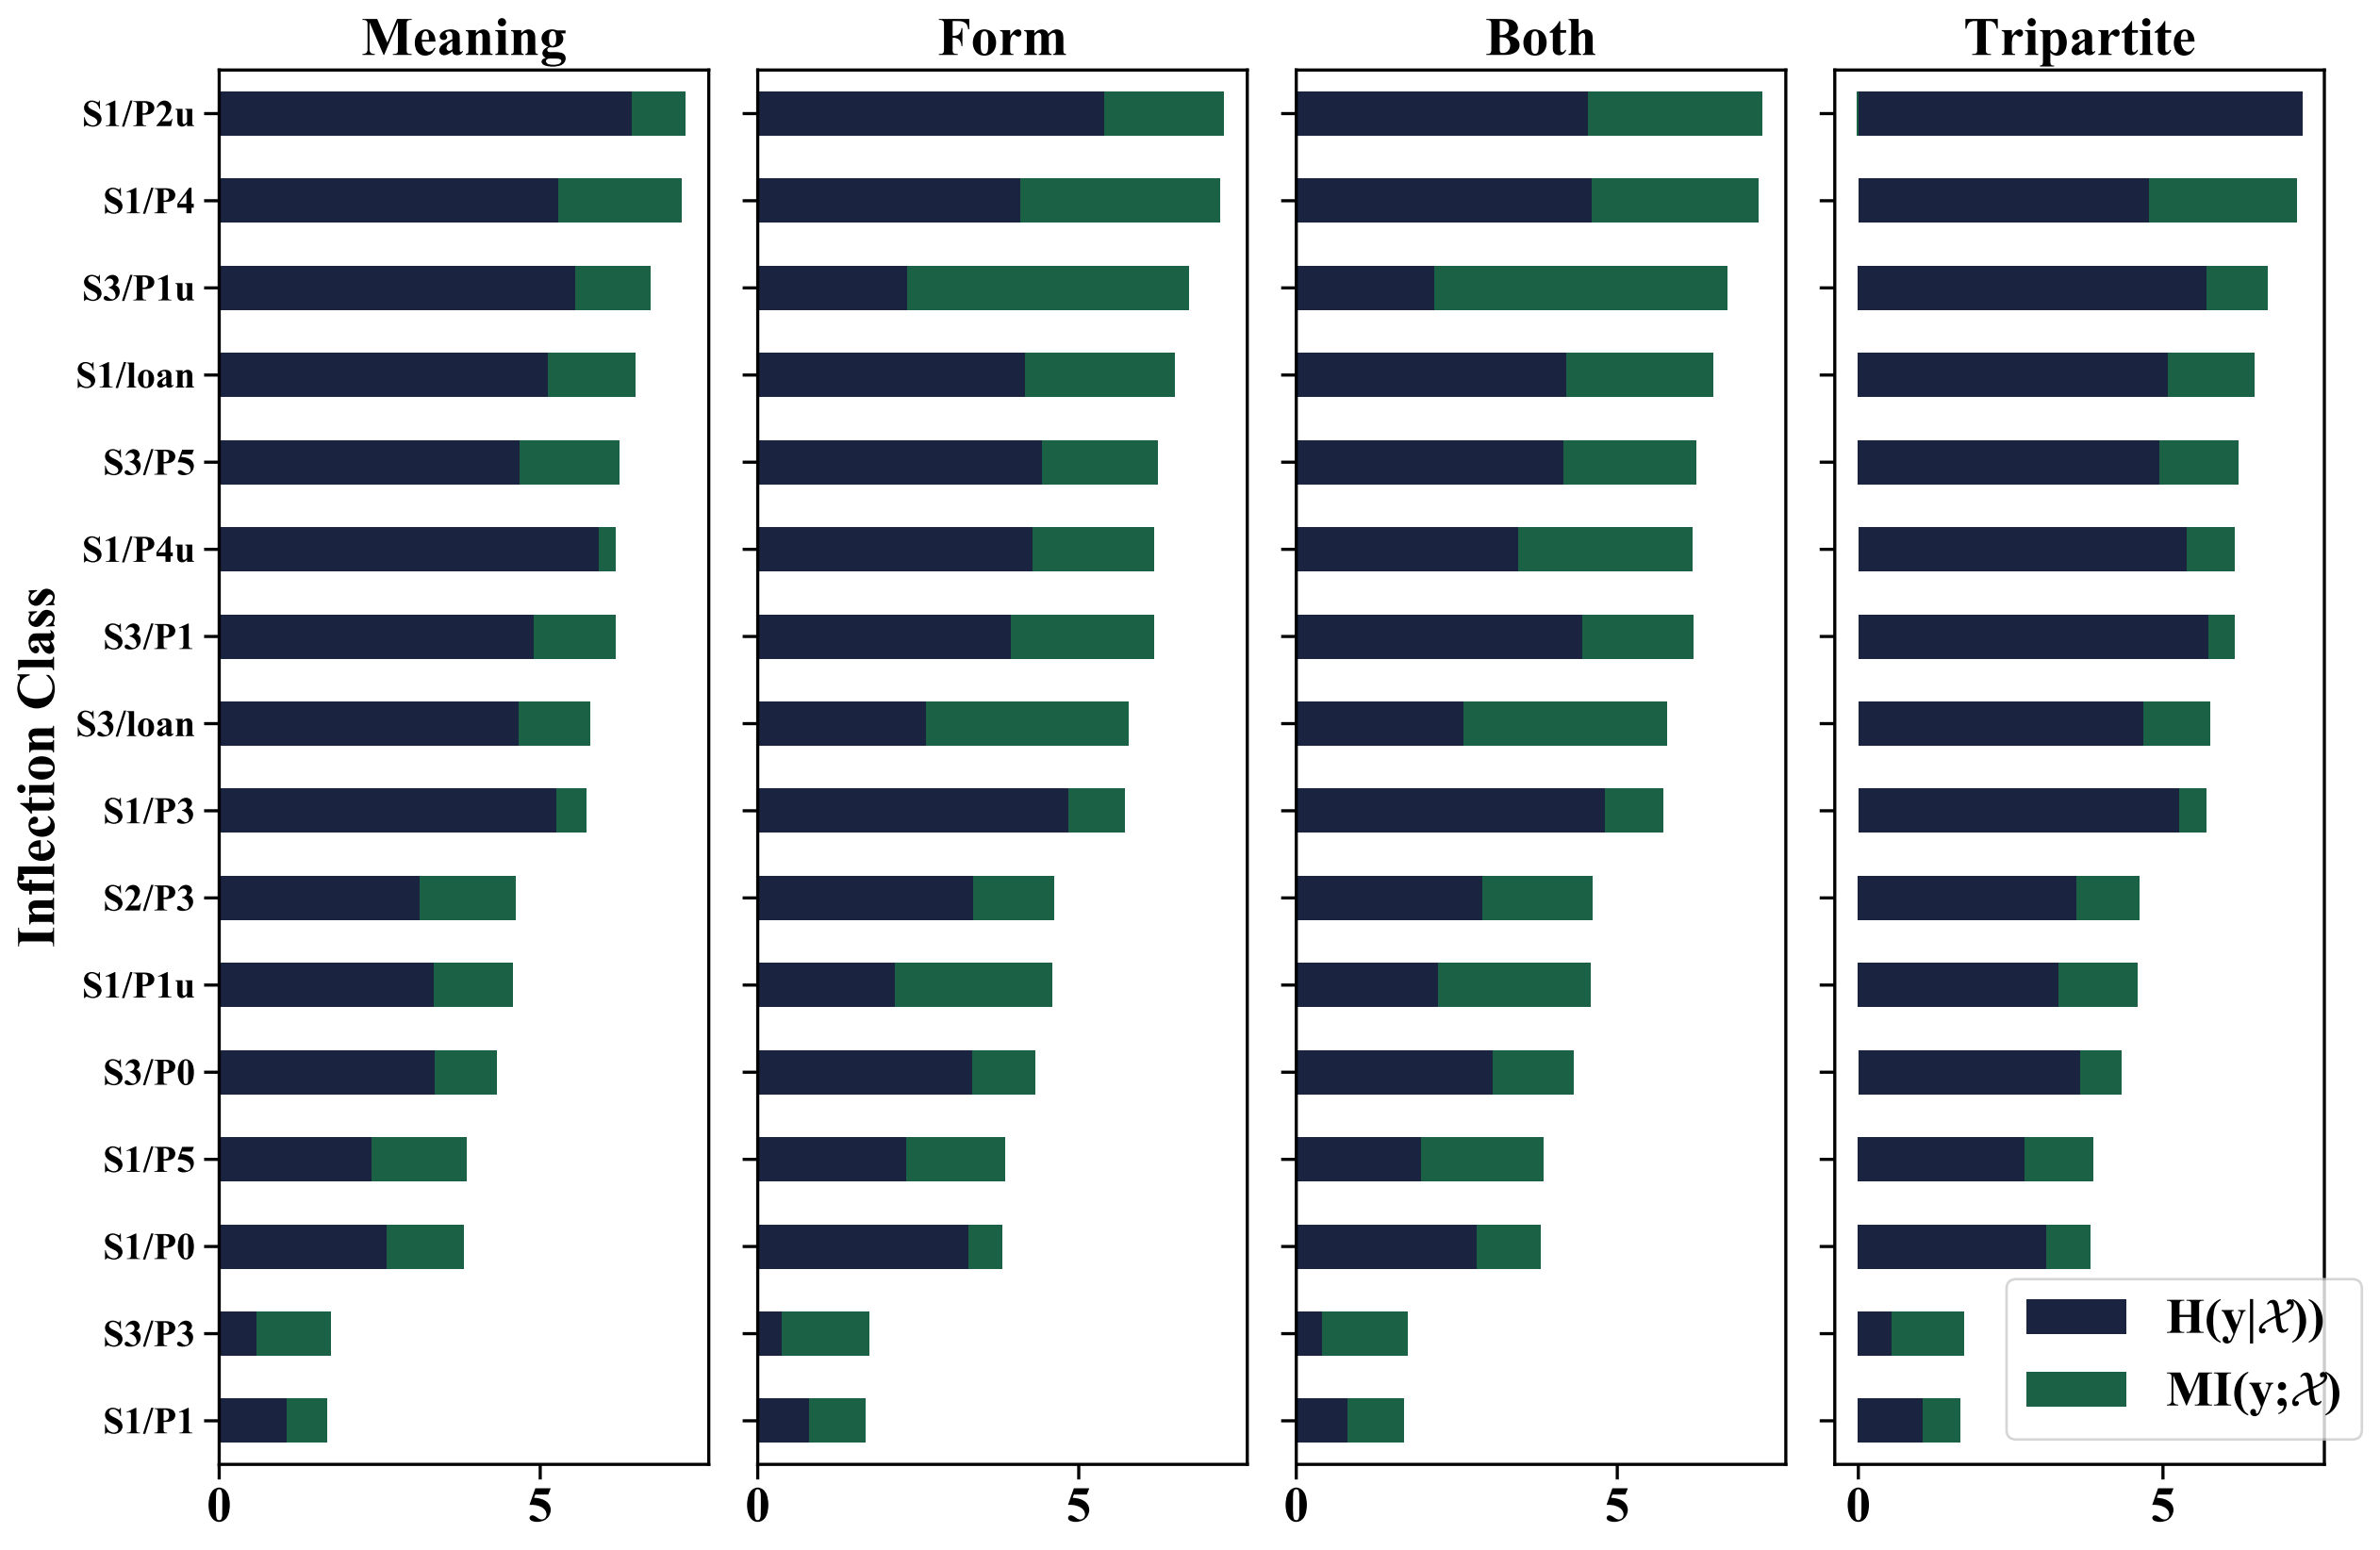

Supplement: Software [file pmi__ger_n__drop__h-first.pdf › figs/pmi__ger_n__drop__h-first.pdf]

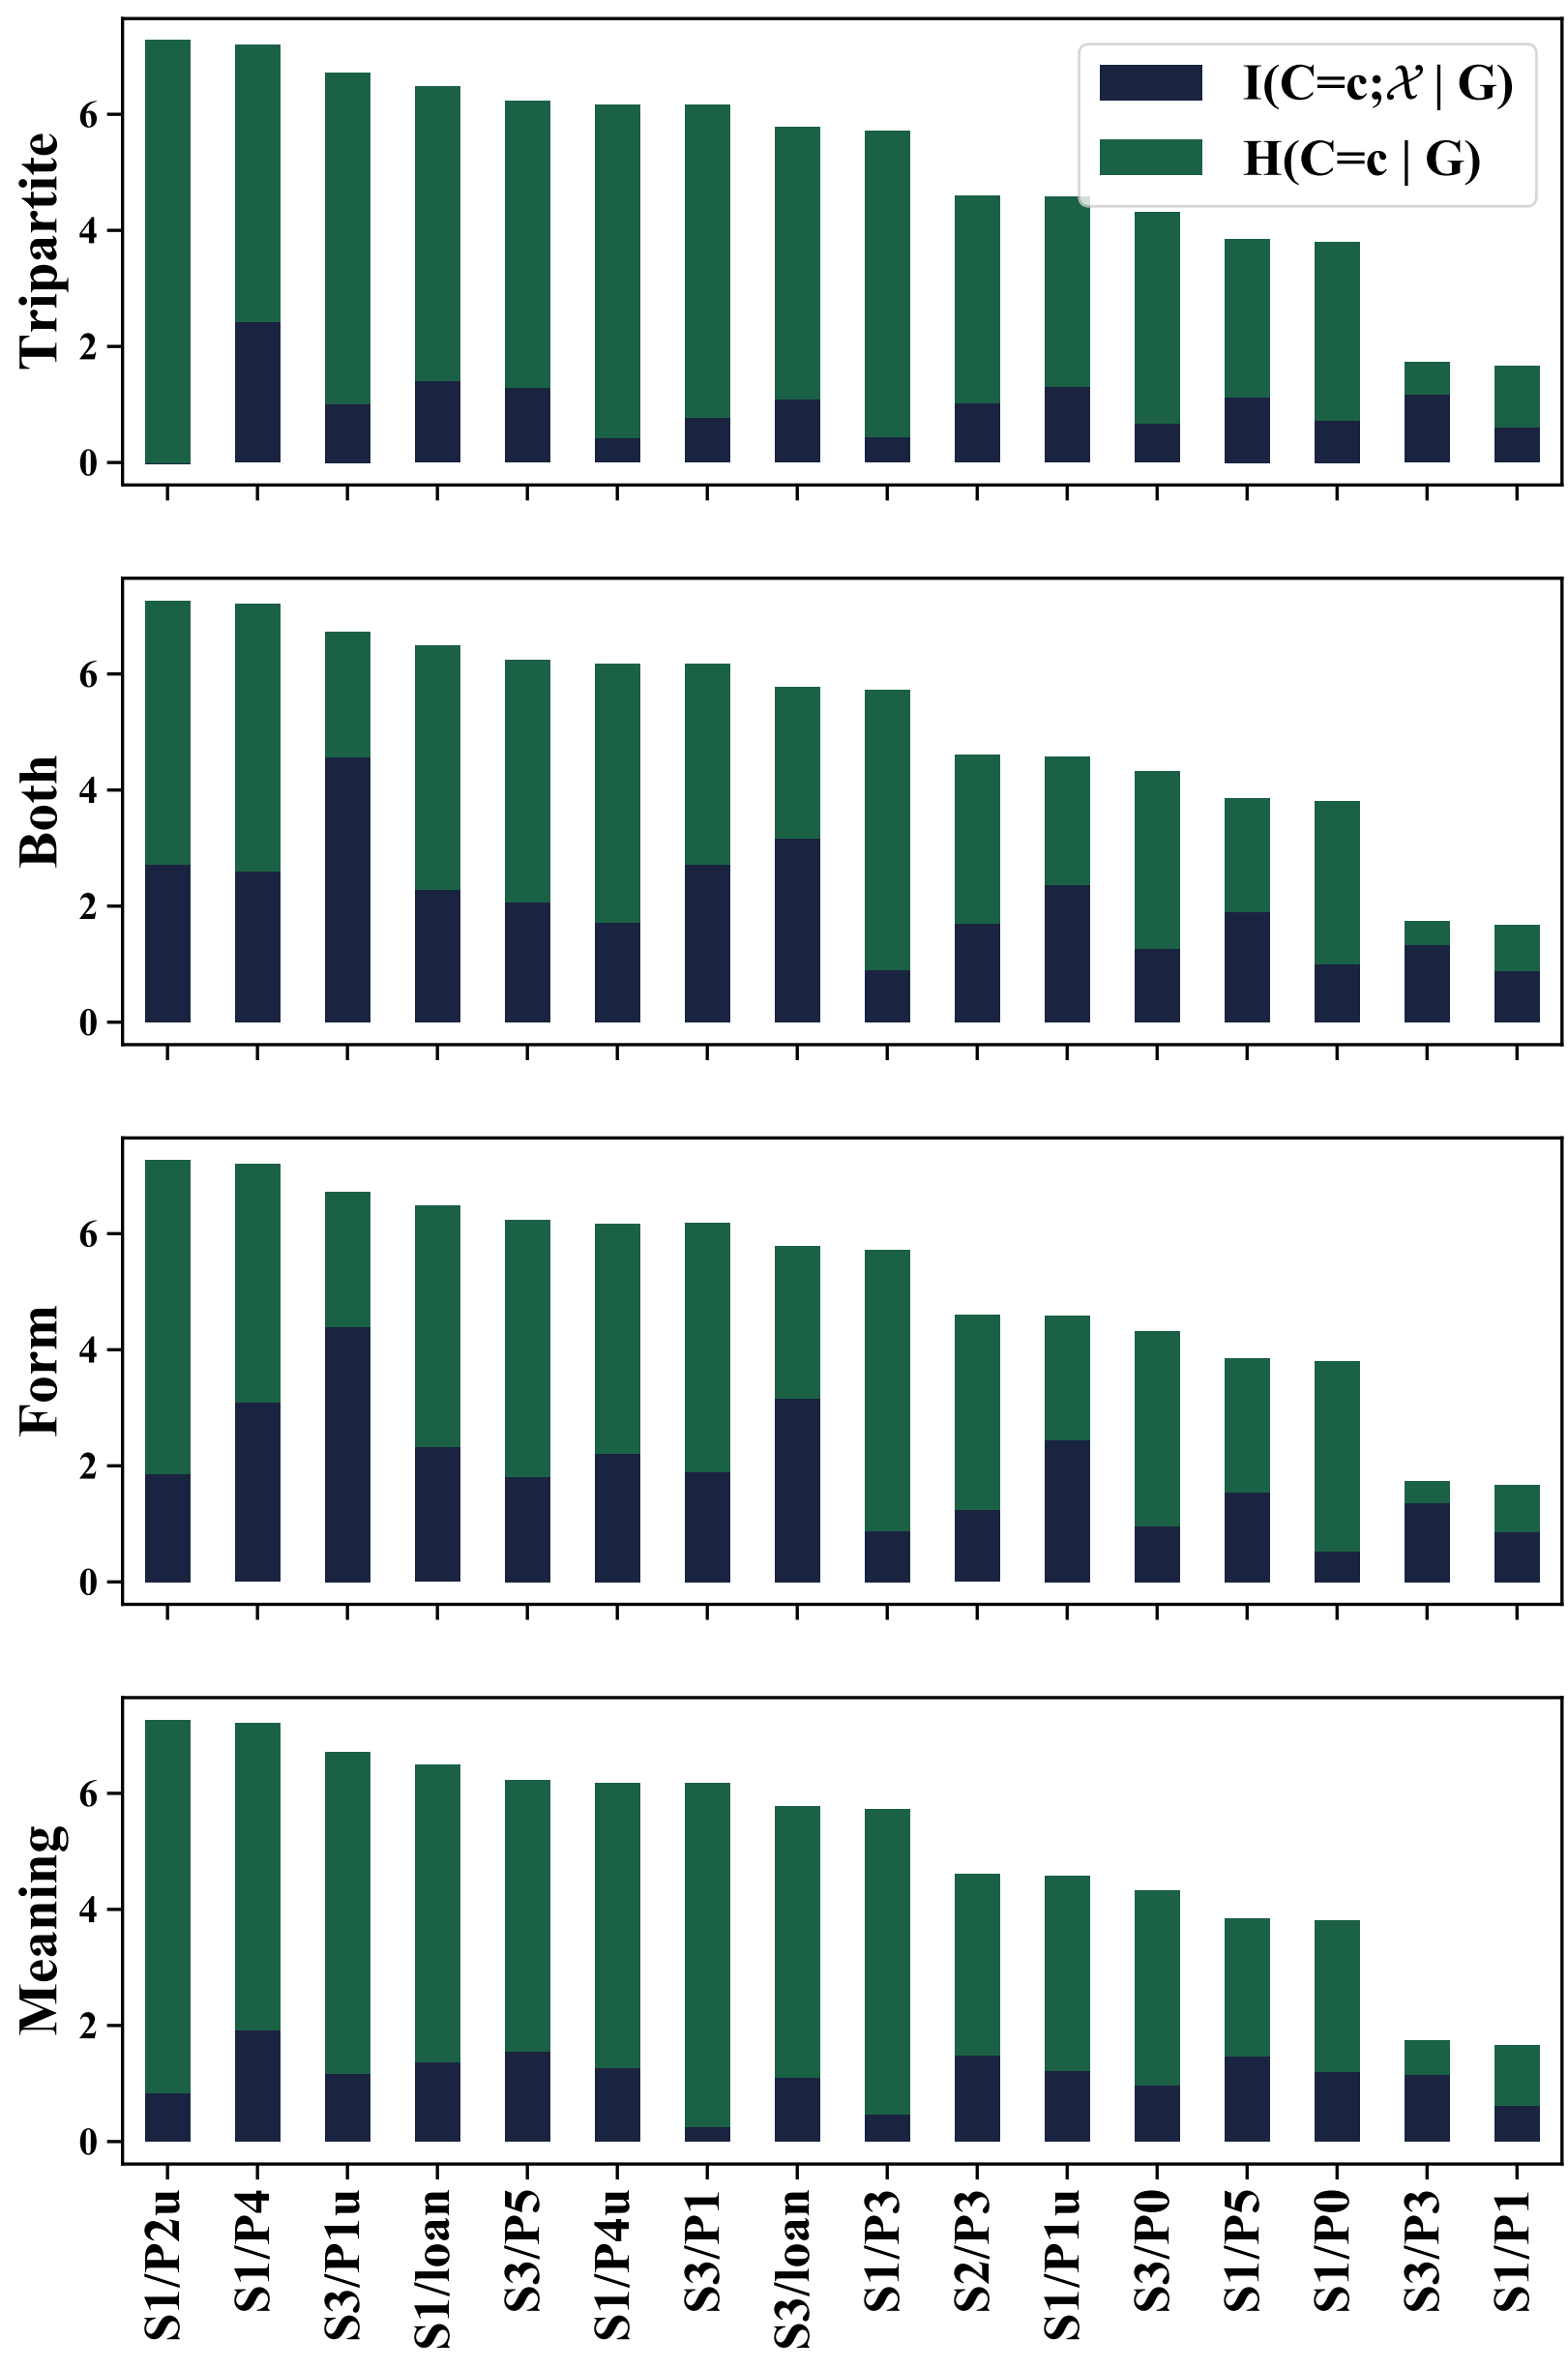

Supplement: Software [file pmi__ger_n__drop_mi-first.pdf › figs/pmi__ger_n__drop_mi-first.pdf]
